# Supplementary material for: Evaluation of SNP Genotyping in Alpacas Using the Bovine HD Genotyping Beadchip
Source: Front Genet. 2019 Apr 24;10:361. doi: 10.3389/fgene.2019.00361 (PMC6492526; doi:10.3389/fgene.2019.00361)
Supplement: Supplementary file 1 [file Table_1.XLSX]

## Sheet: Table 1S
Table 1S. Minimum, maximum, mean and standard deviation of average GC and GenTrainScore by Methods
Parameter of analysis by method		Method I		Method II		Method III		Method IV		Method V		Method VII	Method VI
no-call threshold		0.05				0.15				0.25
call frequency		>= 0,9		1		>= 0,9		1		>= 0,9		1
averageGC		-	>= 0,7	-	>= 0,7	-	>= 0,7	-	>= 0,7	-	>= 0,7	-	>= 0,7
averageGC	minimum	0.0518	0.7	0.0582	0.7	0.1505	0.7	0.1878	0.7	0.2501	0.7	0.2717	0.7
	maximum	0.9357	0.9357	0.9357	0.9357	0.9357	0.9357	0.9357	0.9357	0.9357	0.9357	0.9357	0.9357
	mean	0.436	0.7628	0.5019	0.7709	0.4983	0.762	0.611	0.7742	0.5524	0.7622	0.654	0.7762
	standard deviation	0.1635	0.0518	0.1703	0.0537	0.1538	0.051	0.127	0.0553	0.1327	0.0511	0.104	0.0567
GenTrainScore	minimum	0.1427	0.7323	0.1704	0.7329	0.3515	0.7323	0.3966	0.7329	0.4588	0.7323	0.4775	0.7329
	maximum	0.9324	0.9324	0.9324	0.9324	0.9324	0.9324	0.9324	0.9324	0.9324	0.9324	0.9324	0.9324
	mean	0.6845	0.8165	0.7044	0.8202	0.7013	0.8144	0.7355	0.8206	0.7153	0.8135	0.7511	0.8211
	standard deviation	0.0886	0.0343	0.0786	0.0356	0.0715	0.0338	0.0665	0.0369	0.0632	0.0337	0.0617	0.0378
(-) Results before applying average GC >= 0,7 threshold
