# Supplementary material for: Evaluation of SNP Genotyping in Alpacas Using the Bovine HD Genotyping Beadchip
Source: Front Genet. 2019 Apr 24;10:361. doi: 10.3389/fgene.2019.00361 (PMC6492526; doi:10.3389/fgene.2019.00361)
Supplement: Supplementary file 2 [file Table_2.xlsx]

## Sheet: Table 2S
Table 2S. Polymorphic SNPs common to both reference genomes by Method VI
The following SNPs are archived in the European Variation Archive (Project PRJEB31129, Analyses: ERZ805156- https://www.ebi.ac.uk/ena/data/view/PRJEB31129 ). The reference assembly was Vicugna_pacos-2.0.2.
SNP accession ID (EMBL-EBI)	SNP Name	Bovine SNP Name	Sequence of 101 nucleotides (Vicugna_Pacos-2.0.2)	Scaffold Accesion Number (Vicugna_Pacos-2.0.2)	Scaffold Number: Nucleotide Position (Vicugna_Pacos-2.0.2)	Scaffold Accesion Number (Vi_pacos_V1.0)	Scaffold Number: Nucleotide Position (Vi_pacos_V1.0)	Chromosome VPA Predicted Localization (Avila)	Chromosome VPA Predicted Localization (Balmus)	Percentage of identical matches between reference genomes	Alignment length between reference genomes	Number of mismatches between reference genomes	Number of gap openings between reference genomes	Vi_pacos_V1.0 frame	Minor Allele Frequency	Annotated alpaca genes (Vicugna_Pacos-2.0.2). Color coded acronyms represent ontology groups (see legend). Repeated gene acronym with different colors indicated that they are grouped under different ontology groups.
ss1440341256412	UNALM_VPA_Bovine777K_49	ARS-BFGL-BAC-42478	GCTTGTCCCCAAGCCCTTCTAAAGTATGTGATTCGTCTGACTTGAAGGCATCACTGATGAAAACGGGGAAAAAAATAAACACATGAAAACCAAACAGGTCT	KB632481.1	47:1204023-1204123	KN268694.1	635:1031577-1031677		18	100.000	101	0	0	-1	0.0375
ss1440341256544	UNALM_VPA_Bovine777K_50	ARS-BFGL-BAC-43754	CTCGCTGCTCTGATTGCCTTTCTCCAAAATCATGTTCAGAATAATACCGTTTTGTTTAAGGCTCCAGGTGTTCTTGGAATCTACCATTCTCCATTCTATTC	KB632581.1	147:3602271-3602371	KN267895.1	67:348012-348112		18	99.010	101	1	0	-1	0.0375
ss1440341256261	UNALM_VPA_Bovine777K_51	ARS-BFGL-BAC-5675	AAAAGTCAGTTCAATTTAAATTTGTGGTTACCAATGACAAGATATTACCTGTTTTCACTTTATTTGACAAATGTTTATAAATGGCATTTTTGGAACCCTCA	KB632434.1	0:20855888-20855988	KN268029.1	163:2641656-2641756	5	14	100.000	101	0	0	-1	0.0375
ss1440341256612	UNALM_VPA_Bovine777K_52	ARS-BFGL-NGS-104926	TGGCCCTGTCCAATTTCTTGCTGGAACGACTCCTGGCCCATCCGGATAATCCTTCATTCGCTGTTTACTCACTTGGCATCTCCTCTGAATTCTAAACCGTC	KB632635.1	201:1360370-1360470	KN268163.1	306:3273662-3273762			100.000	101	0	0	-1	0.0375	SYT7 -SYT7
ss1440341256597	UNALM_VPA_Bovine777K_53	ARS-BFGL-NGS-111123	TACGGCTTATTTGCGACACAGCCACGTGTGGTTACAATTTGGTTTCTGAAATTTAGTTTGAAAGAATAGTTGTCTTTTTTTTTTTTTCATTTTTAATACTC	KB632651.1	217:2138659-2138759	KN268482.1	43:11328002-11328102	3	9	100.000	101	0	0	1	0.0375	DNAH5
ss1440341256409	UNALM_VPA_Bovine777K_54	ARS-BFGL-NGS-113021	TAAAAAGGAAAGAAAGAAAACTCTAATTATTAGAAAACAAGAGAAAAATCATGAGAAAGAACACTGCATTCAATCTCCACAAAACTTTTCAGATGACTGTT	KB632469.1	35:2309986-2310086	KN271044.1	193:6106545-6106645		1	100.000	101	0	0	1	0.0375	SLC9A9
ss1440341256487	UNALM_VPA_Bovine777K_55	ARS-BFGL-NGS-117841	CAGGCGCTGCTCCAATAACAAAGAACAGCCAAGGCGGAAATAAAAAATAGGAGAAATCCAGGCGCAGGTTGAGAAGACGAAACTTTTCTCCGGTTGTCTAA	KB632530.1	96:4091874-4091974	KN270902.1	914:2435977-2436077		14	100.000	101	0	0	1	0.0375	TSC22D1
ss1440341256299	UNALM_VPA_Bovine777K_56	ARS-BFGL-NGS-19610	AAGCCAGGCCAGGCAGATCCCACAAGACAATGACCATGGCCTTTTCATCAAGGAGCACACTGCTTTCTGGAATCCACTAACACAAGAGGTTCGTATCTACC	KB632448.1	14:4880206-4880306	KN269929.1	22:9166592-9166692	22	3	100.000	101	0	0	-1	0.0375
ss1440341256330	UNALM_VPA_Bovine777K_57	ARS-BFGL-NGS-20118	CTGACCTCCTTCCCCACCCCACCAGCCGCCCAGGAGGCCCGCAACAAGTTTGAGGAGGCCGAGCGTTCCTTGAAGGACATGGAGGAGTCCATCAGGTGCGG	KB632494.1	60:3277945-3278045	KN269525.1	85:5680533-5680633	22		100.000	101	0	0	-1	0.0375	PRKCSH - PRKCSH
ss1440341256622	UNALM_VPA_Bovine777K_58	ARS-BFGL-NGS-29034	TAGATTCCCGGTGAATAAATGTTAATTTGACCATAAAAATTACACTGTTCAGATCCTTGGCCATTATTTTTTTCCTACTTGATAACTCAAACACTGACAAG	KB632589.1	155:2574937-2575037	KN268423.1	414:8070659-8070759			100.000	101	0	0	-1	0.0375	TBC1D22A
ss1440341256420	UNALM_VPA_Bovine777K_59	ARS-BFGL-NGS-38232	CAACTGTTGAAGTCTAATCAAACTGTCATTTTCCATTCAACACATGGTCATCTGATTATCTGCCACAGGCCTGGCAGTGTGTGGATATATGAGAAGTGTTT	KB632460.1	26:9163566-9163666	KN270149.1	376:3337767-3337867	26	26	100.000	101	0	0	-1	0.0375	PURG
ss1440341256552	UNALM_VPA_Bovine777K_60	ARS-BFGL-NGS-59857	CCTCCGAGGAAATTCTCTTACATGGAATAAATAAACAGAAAAAAAATAAAGAAACGTAGTTTGGAAAAAGCAGACCCGTGTGACTCCAGCATCATGTTGGG	KB632696.1	262:901271-901371	KN270958.1	777:1311993-1312093	36	9	100.000	20	0	0	1	0.0375
ss1440341256502	UNALM_VPA_Bovine777K_61	ARS-BFGL-NGS-65446	CTTTATGAACATTACCAAATGGAAATTAAATAATAGGCAAGAAATGAGGAATTATTTTTTAATTTGAAAATTGTTATTTAGACCTTTTATTTTGTAAATTA	KB632572.1	138:2521124-2521224	KN268469.1	19:3904201-3904301			100.000	101	0	0	-1	0.0375	HDAC9
ss1440341256479	UNALM_VPA_Bovine777K_62	ARS-BFGL-NGS-80508	ACAGAGAAAATTAAAGCCATTCCATACTCAATGGTCTCCAGCCGTTTTTCATATCTGCAGACCAGGCCTACAAATTCAATCATTTTCATTCATTTCAACTT	KB632536.1	102:2960976-2961076	KN267158.1	169:2447722-2447822	2		100.000	101	0	0	1	0.0375
ss1440341256383	UNALM_VPA_Bovine777K_63	ARS-BFGL-NGS-81983	AAGGGATCCACAGACCAGTAGTCATCATCCCAGCCGAGGAACCAGCCCACAAAGGAAGGAGGCTCAAAGCCTTGCTTCACCACGGTGATGGGGGTCCGTCT	KB632486.1	52:8081394-8081494	KN268836.1	12:6582254-6582354	4		100.000	101	0	0	-1	0.0375	GSN
ss1440341256500	UNALM_VPA_Bovine777K_64	ARS-BFGL-NGS-82178	ACTAAAGCTTTTCTAGTAGCCCAGGATGCTGCAGAGGCCTGGGACTTACCTATAGGAATGCTAACAAAAGGCAGCAATTTAAAGTACAAGGATGTCTTTTC	KB632519.1	85:6246832-6246932	KN267433.1	496:2778393-2778493	11		100.000	101	0	0	1	0.0375	LOC102544958
ss1440341256590	UNALM_VPA_Bovine777K_65	ARS-BFGL-NGS-89554	AAGTCTTGACAACAATCTCATTTTCTTTGACCACTAGGGTGCCAACGTAGTTTAAGATATTGTTTTTAACTTTAAAGGTGTCTCTGTGGTTTTGAAGAATG	KB632646.1	212:748851-748951	KN267057.1	137:3931963-3932063			100.000	101	0	0	1	0.0375
ss1440341256385	UNALM_VPA_Bovine777K_66	ARS-BFGL-NGS-90102	GAACGGGCCCCACTTCTGTCTTCCAGGCCACATTTGTGGCTGACTGGCGGAATTCGAATCGCTACCCTGCTGTTATTCTGTTCTACGTCAATGCGTGTTTC	KB632466.1	32:7780936-7781036	KN270033.1	14:12641386-12641486		7	100.000	101	0	0	1	0.0375	SMO - SMO -SMO
ss1440341256459	UNALM_VPA_Bovine777K_67	ARS-BFGL-NGS-98832	ATACCTACTCTTTGCTGCAAGTGCACAGGCCCCCATCCCAAGCACAGGAAAGGAAGAAGGGAGGAGAGAAGGGGCTCTTGAGGTTTTCTTTCTTGACTAAA	KB632564.1	130:1773467-1773567	KN270207.1	143:360192-360292		9	100.000	88	0	0	1	0.0375
ss1440341256584	UNALM_VPA_Bovine777K_68	BovineHD0100002812	GTATTAGAGATGACAGAGGCACAAATGACCCCTACAAGGTTCAAATTAGAGGGAATCCAGGAGCAGTAACGTATTCAAAGAGAAACTGAAGCTGAATGTTA	KB632642.1	208:1413703-1413803	KN267542.1	211:3324525-3324625		1	99.010	101	1	0	-1	0.0375
ss1440341256596	UNALM_VPA_Bovine777K_69	BovineHD0100004383	AGTGTATTAAAAGAACAATGAATTCACATGTGTTGAATGCCTACTATGTGCTTGGCTGTGTGCACAGCAGCCTTTAAGATGCACAATCCTTAAATAAAATC	KB632756.1	322:445068-445168	KN269583.1	62:91555-91655		1	98.020	101	2	0	1	0.0375
ss1440341256623	UNALM_VPA_Bovine777K_70	BovineHD0100005360	ATTTCTTTCCCTATTCAATTCTCTGCCTTTACAGATCTGCTGCGATACTAAATTGCTACCTTGTCAGGAATACGCCCAAGTCTTTTAAGTTTCTCATATGG	KB632699.1	265:1087005-1087105	KN267331.1	396:2646935-2647035		1	100.000	101	0	0	1	0.0375
ss1440341256618	UNALM_VPA_Bovine777K_71	BovineHD0100005669	GATCTGAAATAGATAATTTAGTTCAACACTCTTAATTTATGTTTGAGCCCTAGAGAAGCAACATGTCCAAAATGAAAGAGCTTTTTTTTTGTGACAAACTT	KB632699.1	265:263510-263610	KN267331.1	396:1844333-1844433		1	100.000	101	0	0	1	0.0375	CXADR -CXADR
ss1440341256413	UNALM_VPA_Bovine777K_72	BovineHD0100010739	ATCTATTAAATGGAAGAAGTGGTCCTTTCTCTCTTTAATATTCTCTAATTTTAGCTGAAGACCAAATTTTTGCTTCATGGATACTCTTTACTTTGTATGTG	KB632478.1	44:4842152-4842252	KN267030.1	105:2012431-2012531	3	1	99.010	101	1	0	1	0.0375
ss1440341256448	UNALM_VPA_Bovine777K_73	BovineHD0100013055	TCCAGTTTTTCCTTTATTGATTTTATGTTCAGCTGTTGGTAATTTTGCAAATGTCCAATAAAGTAAAACACGAGAATTTTTTAACATTGAACCTTTATAGA	KB632513.1	79:4441937-4442037	KN268346.1	83:130712-130812		1	100.000	101	0	0	-1	0.025	ABI3BP
ss1440341256569	UNALM_VPA_Bovine777K_74	BovineHD0100014758	AGTTGTAGTTTATTACTATAACCCTCCCAAGTCAAAAGGACACCAGTTTCAAGCCTTGCAACTTGGTGCAGAGAGGGTTTTTCCTCCTCAACCCACTCTGC	KB632663.1	229:543615-543715	KN268932.1	290:2756451-2756551		1	100.000	101	0	0	1	0.0375
ss1440341256593	UNALM_VPA_Bovine777K_75	BovineHD0100014940	TGTTACAACCATCGCTATTTTTGCCGAAAAGTGTGAACATAGTTCTCTGAGAATAAGTCTGGCTCCTTTCTGCAATGATGCTACCGTGTCACTGGACCATG	KB632663.1	229:1027270-1027370	KN268932.1	290:3229722-3229822		1	100.000	101	0	0	1	0.0375	CD47 - CD47
ss1440341256581	UNALM_VPA_Bovine777K_76	BovineHD0100016227	CATCAGCGACAATGGTCCTGACAAGCTCTCTGTTCCTGAGAAAGTCCTGGTAAAAGCTTGAATACCCACCACAGAAAAGTTCATCGCTCTCGTCAAAGCAG	KB632720.1	286:5327-5427	KN268745.1	99:10250890-10250990		1	100.000	101	0	0	1	0.0125	TMPRSS7
ss1440341256578	UNALM_VPA_Bovine777K_77	BovineHD0100026695	AACCTTGCAAACTGCTTTCACTTCCACTCACTCCATCTCCCTGGTGCATAAACTGCAATTCTTTCACACATGGATTTTTGTAAATTCTTTTCTATTTCTCA	KB632735.1	301:1218046-1218146	KN270266.1	549:22384-22484		1	100.000	101	0	0	1	0.0375	LOC102535064
ss1440341256337	UNALM_VPA_Bovine777K_78	BovineHD0100028008	AATTAAATAGCATTTAGTATAATCAGGGCTCTGTAATAGTGAATTAATGTCTGTGTCTAAGTAATTATCCTCAATGTATTAGTATATTTCATCTAAAGTTA	KB632458.1	24:2714783-2714883	KN269370.1	116:2887417-2887517	1	1	100.000	101	0	0	1	0.025	PHC3
ss1440341256395	UNALM_VPA_Bovine777K_79	BovineHD0100028322	TCATTCCTCTCTTCCCATAGAGAGACAGTGTCTGAATCAGAAACCAAAGAAAAGGATTCTAATCCTTTGGTTAGAGAATGGGTAAACATGTTCTGATGTCT	KB632458.1	24:3621638-3621738	KN269370.1	116:3791465-3791565	1	1	100.000	101	0	0	1	0.0375
ss1440341256394	UNALM_VPA_Bovine777K_80	BovineHD0100028874	TACGACTTGGTTCAAAACCATTTATCTAGTCAGAAGCTAGTGCTAAACTATAGTTTAATATTTCTGTTATACAATTTTTGCAACTGATTCTTAGTTTGAAG	KB632458.1	24:5121192-5121292	KN269370.1	116:5270341-5270441	1	1	100.000	101	0	0	1	0.0375
ss1440341256351	UNALM_VPA_Bovine777K_81	BovineHD0100030814	TTTTGTTGATTCCTTCATTACTAGGGAGTGATGATTAAGAAACTCAAGGTCGGTGGAGTTATTCCACGGTCATTGTCCAAAAATGAAGGATTCTAATTAAA	KB632458.1	24:10513970-10514070	KN269370.1	116:10550657-10550757	1	1	99.010	101	1	0	1	0.0375	LOC102540296
ss1440341256424	UNALM_VPA_Bovine777K_82	BovineHD0100035296	GTAAGTTCAGTTGGAGTCAGAAGCAGAATGTTTATACCTTAAAAATTTACAAAGAAGCTGTAAGTGGAAACTCATGTTCACATGGCATTCTACTTAACAAA	KB632469.1	35:3298030-3298130	KN271044.1	193:7073826-7073926		1	100.000	101	0	0	1	0.0375
ss1440341256277	UNALM_VPA_Bovine777K_83	BovineHD0100037909	CACTTGGCTTACCATAATTTTAGGAGAGGGTGCATCCTTCCCATTAGAGATAGAAAAAAGTAGCAAGAGAAGAAATTATTCTGGTCCTGAGCCCATCAATA	KB632451.1	17:12313159-12313259	KN270574.1	358:4085611-4085711	6	1	100.000	101	0	0	1	0.0375
ss1440341256449	UNALM_VPA_Bovine777K_84	BovineHD0200004971	TTGCTGTTTTATGATACCTCTTGCCCCTGATATCACAAACATTCCAGTCTTGTTGATATCAGCTTAGAAAGGGGGGCATGGGAGCACGACCTGCAACATAT	KB632542.1	108:2252764-2252864	KN269558.1	556:397046-397146			100.000	101	0	0	1	0.0375	ZNF385B
ss1440341256556	UNALM_VPA_Bovine777K_85	BovineHD0200007247	TTTAGACAGTGCAAAGTCTCCTCGGGAAAAGGGGTAGCTGAGAAAATCCTAGATATGGCAGCCATGTTTTGCACTGACTAAGGTTTCACAATCTCACACTA	KB632619.1	185:2153291-2153391	KN267858.1	288:5944046-5944146			100.000	101	0	0	1	0.0375
ss1440341256361	UNALM_VPA_Bovine777K_86	BovineHD0200009037	CCATGGTTCCCTTAGAACTCCATCAAATGCACTTGCTCTGTGGTTGGAACATAATGCAAATCCTTTTATCCTGCATTTGTTCAGCGCTCATTTCTTTGGCT	KB632460.1	26:146948-147048	KN266965.1	113:6204291-6204391	26		100.000	101	0	0	1	0.0375
ss1440341256245	UNALM_VPA_Bovine777K_87	BovineHD0200010631	ATCTTCAAAGTCCACGAATGTCATGCTGCCATTGTGTCAGGATTGATCTCCTTTGTTCTAAACCGAAGAGCATGCCTCTCCTGCCTCTCCTAATTCTTATA	KB632434.1	0:34979763-34979863	KN266965.1	113:1814443-1814543	5		99.010	101	1	0	1	0.025	ITGB6 - ITGB6
ss1440341256304	UNALM_VPA_Bovine777K_88	BovineHD0200010675	AATGTAATTCTCTCTCCTGTGGAAAAGAAACACAGAAAATTGGAGTCCTGTTTTGTGTTTGCCTAGTGTGAAGAGGAGACACATAAATTACATCCATTGAG	KB632434.1	0:34878750-34878850	KN266965.1	113:1714099-1714199	5		100.000	101	0	0	1	0.0375	ITGB6
ss1440341256282	UNALM_VPA_Bovine777K_89	BovineHD0200011478	AAATTTGCACACTTTTAGTTATCATTTCCTCAATTCTATAATACCAGATATTGGTGTACTCATATTCTGGGAACACATATGTTTAAGTGTCATTCTGTTTT	KB632434.1	0:32439053-32439153	KN267465.1	220:2172669-2172769	5		99.010	101	1	0	1	0.0375
ss1440341256289	UNALM_VPA_Bovine777K_90	BovineHD0200011508	AAAACATGTTTTTAAAATAATTTTATGGAGGGCAGATTTTGTAAATGATCATGTTAATTGTTGGGAAGGGGTTCCCAACCTTGTTAATGTCCCCTTCCCAT	KB632434.1	0:33172166-33172266	KN266965.1	113:20104-20204	5		100.000	101	0	0	1	0.0375
ss1440341256435	UNALM_VPA_Bovine777K_91	BovineHD0200012635	TCGTTCAGGCAGCTGTGTCGGCAAGAGGCCCTCATCCCCCATCCCCTCACTGGGGGGTAGCCAAGAGCCTGGGGACCTTCTAGACTCCTCCGTCTGTCCTA	KB632560.1	126:3142613-3142713	KN269242.1	340:2105988-2106088			100.000	101	0	0	-1	0.025	DPP6
ss1440341256269	UNALM_VPA_Bovine777K_92	BovineHD0200013812	CATTTTAGACCTGTCCTCTGGGAAGCTTAAGAGTTCCTTTGAAACCATATTCTAAGTCATGCGTGTGAAAATGGGCTTTACCCCTAACTACTGTGGGGTCA	KB632434.1	0:26400489-26400589	KN268982.1	408:1440735-1440835	5		100.000	101	0	0	1	0.0375	EPC2
ss1440341256228	UNALM_VPA_Bovine777K_93	BovineHD0200014148	TTTCTCCATGTCATCCCTGTAGCCTGCAGGCCACTCCACGCCCTGCATTCCTGTCAGGTGTCCTGTCAGGCAAAGCTGGTTTATTCGAGGTCATGCTGGCA	KB632434.1	0:25390670-25390770	KN268982.1	408:431185-431285	5		100.000	101	0	0	1	0.0375
ss1440341256286	UNALM_VPA_Bovine777K_94	BovineHD0200016854	ATTAAAAATACAAATCTACAAAACAAAAACTTAATTTCCCAGCTCCAAGTATCGTCTTCCACTTGGCACAGAGCTGTGTCATCAGAAGTTAAGGCTGCAGT	KB632434.1	0:17804308-17804408	KN268029.1	163:5649673-5649773	5		100.000	101	0	0	-1	0.0375
ss1440341256591	UNALM_VPA_Bovine777K_95	BovineHD0200017564	TGTATCTCCTGGCCTTAATGTGCTTTGATATTTTTAGGGATCTTGTCCATAGAACAGCTCATCAGCCGGGTAGGTGTGATTGGGGTGACTCTCATGGCTCT	KB632587.1	153:3981765-3981865	KN266865.1	1559:461756-461856			100.000	101	0	0	1	0.025	GPR89A
ss1440341256318	UNALM_VPA_Bovine777K_96	BovineHD0200017848	TCCTTTGATTGTTAACTTGAGGTCTAAATATGTTCTAAGAAAACTTAACTACTTCCTTCCCATAGCTTTGTAAAATCCCTATTGATTAGCTATGGAAACAT	KB632434.1	0:15681902-15682002	KN268268.1	271:4057264-4057364	5		99.010	101	1	0	1	0.0375	R3HDM1
ss1440341256320	UNALM_VPA_Bovine777K_97	BovineHD0200018782	CCTTCTCCGTTTCAGCCTATATTCCCTTTCCTGCCCCCACAGAAGGGCCACCCACACCTCAGAAGGAACTCTTGCCTAGACAGGAGATCTGGGAGGAATCT	KB632434.1	0:13296603-13296703	KN268268.1	271:1707611-1707711	5		100.000	101	0	0	1	0.025	NCKAP5
ss1440341256262	UNALM_VPA_Bovine777K_98	BovineHD0200021546	AAAAGTTGCCCTGGCAATTCTCATCTATTTAGTGGTCACATTGATCCTACATCATGTTGATTTCCTACAAAGTTAATTTCTCACTTCTTCAGAATGTAATG	KB632434.1	0:6164939-6165039	KN270668.1	566:1556704-1556804	5		100.000	101	0	0	-1	0.0375
ss1440341256624	UNALM_VPA_Bovine777K_99	BovineHD0200024100	AGGGAAGAAGGCACACATACAGTTATTTCAACACACTTTAAAAGTACTGTTGTAGAAATCAGTACAGGCATAAAGCAATAGAGATGGACTCTGCTAGGTAA	KB632667.1	233:183799-183899	KN267665.1	57:1265993-1266093			99.010	101	1	0	-1	0.025
ss1440341256348	UNALM_VPA_Bovine777K_100	BovineHD0200024860	CTTTGTTGCTTTCTGAAAGGTCTACCAGAATAAAGTACTTCTTGGTAGTTTTGCAAGTTTTTGTTTAGTGTCTTTCTAATCACATTTCAGGCTCTTGTGTC	KB632483.1	49:907281-907381	KN270260.1	410:951507-951607			100.000	101	0	0	1	0.0375
ss1440341256540	UNALM_VPA_Bovine777K_101	BovineHD0200025534	TGATGACGTTAAAGCTGCTGTGTCTTGCTGATTGAATGGTGACATAGGAAGTGGCTAAGTGATTCCTGTAAATCAGCTATTACCCCTTGTCATTCTCTGAC	KB632642.1	208:857325-857425	KN267542.1	211:3874870-3874970			100.000	101	0	0	-1	0.0375
ss1440341256393	UNALM_VPA_Bovine777K_102	BovineHD0200027741	AAACAGTGCCAAATGCCAATAACATATTTCAGTCGTTTGGGGAATGGGCAGCTTTAGAAACCACAAATTCCCACTTATGCAAGGGCTACTTGAACTTTTTC	KB632483.1	49:8367814-8367914	KN270946.1	1902:90622-90722			100.000	101	0	0	1	0.0375	PLEKHM3
ss1440341256345	UNALM_VPA_Bovine777K_103	BovineHD0200028208	AGGACAACTTCTTCAAGCGTTCAATTGGTAAATGTCACTTGGCCTAAGAATTACATCTAACTTTTCATTACACAGAACAAACATTTAATGAGATAAAATGA	KB632483.1	49:9542612-9542712	KN268826.1	514:504673-504773			100.000	101	0	0	-1	0.0375	UNC80
ss1440341256382	UNALM_VPA_Bovine777K_104	BovineHD0200030939	CCCGATACACTGTGGGATGATGCAATGAAAGAGAACAGCTGAGTCAAGCCTGGAGATCTCTGAACCAGAGGCACTAGGATTACCCCAGGGCTGACAACTCC	KB632501.1	67:2652422-2652522	KN267665.1	57:7106776-7106876	5		100.000	101	0	0	-1	0.0375	PRKAG3
ss1440341256401	UNALM_VPA_Bovine777K_105	BovineHD0200032161	CACATCATGAAGCTTCTTTTTAGTTATTTCTAATTGGTTACAGATGTTCATCACGGTCCCTGCCTAATGGATTGTATCTGCTGTCCATCCCTGTGCTCAAA	KB632461.1	27:2731214-2731314	KN267249.1	97:10115507-10115607	18		100.000	101	0	0	-1	0.0375	HS3ST4
ss1440341256476	UNALM_VPA_Bovine777K_106	BovineHD0200032353	GCTTGTAGCTTGGCAGGTATAGTTGTATTTGCAAGGAGTTCCAGAGAACCTATTGTCTTGAAAGAATAAGATTCACTAAAGTCTTCACTTCTACATAAATA	KB632510.1	76:6602948-6603048	KN267665.1	57:10824838-10824938	5		100.000	101	0	0	-1	0.0375
ss1440341256468	UNALM_VPA_Bovine777K_107	BovineHD0200032570	CTGGGAAAAAAACTACATTTCATGGGCTATAAATCTGGCTCATAATTACTGAAGTTTCTTGAATTGCCTTTGAAAATATAATTAATTTTTCCTCTATACAT	KB632510.1	76:6081626-6081726	KN267665.1	57:11340189-11340289	5		99.010	101	1	0	-1	0.05
ss1440341256517	UNALM_VPA_Bovine777K_108	BovineHD0200032907	AATCACTAGGAATTAAACGGCTTCTTTTAAGAGTGTCAAAGAAAGTGTTACTCTTGCCAGTCACCCATCAGGAGGGAGCGAGGAGCTGCCCAGAGCCAGTT	KB632510.1	76:5423636-5423736	KN268883.1	602:1988448-1988548	5		100.000	101	0	0	1	0.0375
ss1440341256440	UNALM_VPA_Bovine777K_109	BovineHD0200033026	ACGGATCTATCCGCCCAAATGCACTTCAGTAAATGCTCCCTATTTCCATAAAGTCTTCTGCCACAAATCATGAGTATGATTCCAGAAGCCATAACTATCTA	KB632510.1	76:5128686-5128786	KN268883.1	602:1710218-1710318	5		100.000	101	0	0	1	0.025	NYAP2 - NYAP2
ss1440341256415	UNALM_VPA_Bovine777K_110	BovineHD0200033471	CCCACACTGAGGGATTTGGGCTAACTGGCCGAGTCACAGAGTCAGACTTGATCAACGATAAAGCGAGGAGAGACTTTGAGAGTCTCTCCTGGCAGAGGGTC	KB632470.1	36:11816559-11816659	KN267589.1	82:7673180-7673280			100.000	101	0	0	1	0.0375
ss1440341256457	UNALM_VPA_Bovine777K_111	BovineHD0200034784	CATTGTGTTGGGAGTAGCAATAAAAGGCTTCTGGAGATATTTAATCTTTACTTGCGTTTGGAATGCTGCTGAGTCATGATCCCACAGCTGAGCATTCTCAC	KB632510.1	76:803520-803620	KN270213.1	393:808888-808988	5		100.000	101	0	0	1	0.0375	B3GNT7
ss1440341256301	UNALM_VPA_Bovine777K_112	BovineHD0200035224	TGATTCATATCCTGTAGGAGTTCTGAGCAAATTTATTCCACCTAGCTGCAAAATAACTACTAAAGATAAACTACGTTTCTCCTTAAGAAAATGACTTGCTT	KB632436.1	2:23372180-23372280	KN270912.1	104:944196-944296	13		100.000	101	0	0	-1	0.0375
ss1440341256483	UNALM_VPA_Bovine777K_113	BovineHD0300002395	TGTAGGGTGTTTTCTTTCCTTGATGGCAGTAGGAAGACCTCACTTTCATAACATACTACTCTTGATACTTTCTTTAAAGATACTTTTCATTAAAGATTCTC	KB632523.1	89:5752392-5752492	KN267263.1	202:6595396-6595496	14		100.000	101	0	0	1	0.0375	USP12
ss1440341256465	UNALM_VPA_Bovine777K_114	BovineHD0300002699	CGTTAACATCAATGAATACAAGCGTCGAAAGGACCTGGGTAAGAGAAGCATGCTTCCTGAGGAGGAGGTGTTAAGCCCTGGAGAATGTTCTCCTGCTCAAA	KB632547.1	113:2404818-2404918	KN267092.1	404:3573386-3573486			100.000	101	0	0	-1	0.0375	DNMBP
ss1440341256599	UNALM_VPA_Bovine777K_115	BovineHD0300005696	GTCAGACATGATTCACCCCACTCCCCTCAATTACCCGTTGGCTCAGCTTTTGTGATGAAAACCACCCACTTGATATTTTTTGGCACCGGCTGTCTGACAAT	KB632631.1	197:2813553-2813653	KN267078.1	1238:23168-23268	21		100.000	101	0	0	1	0.0375
ss1440341256587	UNALM_VPA_Bovine777K_116	BovineHD0300009919	GGGGCTCCTCATCCTTCGTTGAACAGACCCTCTGACTAAACTCAGATTCCTATGGAGGTGCTATCTTTTGGCTGCTGAGACCTATCATTCAGGCCTACTTC	KB632749.1	315:924991-925091	KN269500.1	324:893057-893157			100.000	101	0	0	1	0.0375	DDX20
ss1440341256553	UNALM_VPA_Bovine777K_117	BovineHD0300011116	ATAATATAATCAAGCTTCATCTCAAGTCTTTGGCCTTGTATATTGGAGATGTTCAGAAATATTTTTTTCTGAATAAATGTTTTGCAGCCATTTCCTGTAGA	KB632746.1	312:441335-441435	KN268973.1	449:1834638-1834738			100.000	101	0	0	-1	0.0375
ss1440341256287	UNALM_VPA_Bovine777K_118	BovineHD0300012663	AGTTATGCAGTTTTATAAAAGGGGGTCAGAAAAACAGTTAAGGCCAGGTCATTAAAATAACCACCACATAGATGAAGCTGTACAAATTCATTGCCTCATTC	KB632438.1	4:9529467-9529567	KN269500.1	324:7774553-7774653			100.000	101	0	0	-1	0.0375	OLFM3
ss1440341256296	UNALM_VPA_Bovine777K_119	BovineHD0300013252	AGCTCAGGCCTAATTTTACTATAGCAATGGTTGTGGTAAGTGATTTATTATTTTCAAATTTCAAAAATGTTATTATAGGGTTTATTTAGTTCTTTATTTCC	KB632438.1	4:8090578-8090678	KN269500.1	324:9186611-9186711			100.000	101	0	0	-1	0.0375	AGL
ss1440341256233	UNALM_VPA_Bovine777K_120	BovineHD0300013483	TTATGGTCATGCTATATTACTAAATGAATAGAGCAGCCTACAAAGTAAAATCTAAACAATATCGTTTTGGAAATTGTACATATAATTTGAATATGTAAATA	KB632438.1	4:7598994-7599094	KN269500.1	324:9676228-9676328			100.000	101	0	0	-1	0.025
ss1440341256241	UNALM_VPA_Bovine777K_121	BovineHD0300014453	AACACACGAAGCCAGCCTCACACAGAGCAGCCATTTGTTTTTATTGCCAGAAATGACAACTGATAAAGTAAGCACTGTGCACACCCCAAGCATCTCCTGGA	KB632438.1	4:5130945-5131045	KN269500.1	324:12079850-12079950			100.000	101	0	0	-1	0.0375
ss1440341256606	UNALM_VPA_Bovine777K_122	BovineHD0300020707	ACAGTCACAAAAAGTAAGAACCATATAAATCCCCTTCACTTAGCTTGGCATCACGTCTTTGCACTTAGACTTGAGTGGTTATGCTTGTGTGATGTTTAGAC	KB632709.1	275:456737-456837	KN269662.1	341:2656480-2656580	13		99.010	101	1	0	1	0.0375
ss1440341256560	UNALM_VPA_Bovine777K_123	BovineHD0300023408	GCATCTTCCATTACCCTTTCTGGCTCTTCTCCATCACTTAGAAAACAACTAGAGAAAGAGGAAAGCTCACAGCACCAGGAAGTTTACCCTCACGTCTGGCT	KB632668.1	234:1290596-1290696	KN267902.1	346:784604-784704	1		100.000	101	0	0	-1	0.025
ss1440341256355	UNALM_VPA_Bovine777K_124	BovineHD0300023489	GTGTGTCAGGGCTACTAGAGGTCTGTGAGGAAATGCAAGAAACTTGTTCACTTCTTGCTCAGTTTGGATCACCGGAGCTTCAGATTAGGGCCAGCAACTGT	KB632485.1	51:7992937-7993037	KN266918.1	161:1382891-1382991	13		100.000	101	0	0	1	0.0375	ROR1 - ROR1
ss1440341256433	UNALM_VPA_Bovine777K_125	BovineHD0300024359	AGACATTCAGCCCAATGTTCTTCAAACTTAAAACTGGGATTTAGTGCCACCAGGAAACAGCAGGTAAGCACGAAAGCTGAGGCCACTTATCACAGTGACTG	KB632530.1	96:3434186-3434286	KN270902.1	914:1784636-1784736			100.000	101	0	0	1	0.0375	LOC107034070
ss1440341256352	UNALM_VPA_Bovine777K_126	BovineHD0300025020	GAGGAGAAAGACATGCCAATGACTTGAGCTCTTAATGAGATGCCCACCGTATCTAGGAGTAAGCAATTTCCCAGAGAATTATTTGATGTGAAAGGAATAGT	KB632456.1	22:12502501-12502601	KN268338.1	75:1267872-1267972	13		100.000	101	0	0	1	0.0375
ss1440341256347	UNALM_VPA_Bovine777K_127	BovineHD0300026941	CTCTAGGTACCACTTGACAAAGATAGTGAGATCCTGGGGTTTGGTCCTCTTGAGAGCAGTTAGCAGAGCAGAAGATGGACCACACCTCCCCAGGGCTGGAT	KB632476.1	42:3775129-3775229	KN267573.1	170:4057521-4057621	4		100.000	101	0	0	-1	0.0375	COL15A1
ss1440341256336	UNALM_VPA_Bovine777K_128	BovineHD0300027655	GTTTACTCTTTTGCTTCAAGGAAAAGGGTTTCTTGAGGGAACAACTTTACCTCCAATAATGATTTATTTGGGTCCAGCTGGGTTACCTAAAAAGAAAGAAA	KB632456.1	22:5316227-5316327	KN267108.1	41:1031758-1031858	13		100.000	101	0	0	-1	0.0375	FAF1
ss1440341256346	UNALM_VPA_Bovine777K_129	BovineHD0300029085	GCCCAGAAATCTGTCATTATAAGAACATTTTCAATCAAGCCAAAACCACTGAGTAAAACTTGAAGGAAAAAACAAAACCGGATGTATGTTTGTGTGGTGGT	KB632456.1	22:1433034-1433134	KN267108.1	41:4887661-4887761	13		100.000	101	0	0	-1	0.0375	EIF2B3
ss1440341256444	UNALM_VPA_Bovine777K_130	BovineHD0300030628	AATTTTTTTTCTCAGATCTCTCAATTTCTCTCACTTCTAATTTATTGAAGTAGAAAATAAATTAAGTTCCAAAAATTTCACCAATTTCCAAAATTTTCTCA	KB632537.1	103:2532280-2532380	KN268387.1	1:23267524-23267624			100.000	101	0	0	-1	0.0375
ss1440341256343	UNALM_VPA_Bovine777K_131	BovineHD0300031640	ATAGTAAGATCGTAAACTGTAGTGAGAATGGGATGGAAAGAAGAGGAAAGATGTGAGAGGTATGATGACTTAGAATTAGTATTCTCAGTTGATTGCCTGTT	KB632485.1	51:3082294-3082394	KN270832.1	680:2636783-2636883	13		100.000	101	0	0	-1	0.0375	LRRC40
ss1440341256532	UNALM_VPA_Bovine777K_132	BovineHD0400001013	TCCTCACCAAGCTGAAGCTTCATCTAAGTAATGAGCAACATTAATCAAAGTTCAGCTGGAGTAATCAGGCTGCAGACAACGCAACCACTGAAAAAGTCTGC	KB632828.1	394:539337-539437	KN268672.1	765:70241-70341	36	7	100.000	101	0	0	1	0.0375
ss1440341256475	UNALM_VPA_Bovine777K_133	BovineHD0400009692	TGCCCCGAGGGAACTGGACATACAGAGTTGCTTTTGATGCCTTGTAGAGCATAGCTTATCAAAAAACAGAACGAGGTGATGCACCCAGTGTGGTGGTGAGG	KB632576.1	142:3998249-3998349	KN271041.1	302:3248859-3248959		7	100.000	101	0	0	-1	0.025
ss1440341256554	UNALM_VPA_Bovine777K_134	BovineHD0400011363	TCCAGCATTACATGGCATTCCAGTTGGCTATTTTTGCTATCTGCGTAAAGGCAGGCAATCATCTTAGAGTCACAGGATTTGGAAGGGAAGTGAGAATAGTA	KB632692.1	258:1938849-1938949	KN268567.1	238:7716104-7716204	7	7	100.000	101	0	0	1	0.0375
ss1440341256250	UNALM_VPA_Bovine777K_135	BovineHD0400012389	TAAAGACAATGTATTTGGAATAATGTACATAAATGGCACACACTTACCAATTCTCTTGGACCATATGGCTCACAGAAGGTGACGGCATTGCCGTGCATAAT	KB632445.1	11:10112043-10112143	KN268567.1	238:4679469-4679569		7	100.000	101	0	0	-1	0.0375	RELN - RELN - RELN - RELN - RELN
ss1440341256369	UNALM_VPA_Bovine777K_136	BovineHD0400014719	TTTGCGAATACATTTAGAGTCAGAATTAAACCCCCGTTGCCACAATAGGCTGTGCCTATTTCACATCACATAAACGTGATTAATACAAAGAAATTGAAAAT	KB632493.1	59:1842723-1842823	KN270033.1	14:2678793-2678893		7	100.000	101	0	0	1	0.0375
ss1440341256575	UNALM_VPA_Bovine777K_137	BovineHD0400015427	ACAAAATGAGAGCAGTGACAGAAGTAGCAGGATACTTTTTACAAATAAAAATACAATATACAAAAAATGGCAAGTTAGTGATAACTGGTAGTATGAACTCT	KB632743.1	309:1223205-1223305	KN270033.1	14:745093-745193		7	100.000	101	0	0	1	0.0375	TMEM168
ss1440341256331	UNALM_VPA_Bovine777K_138	BovineHD0400016121	GTTAAAGTCATCAAAAATGACTGGAAAGGGAGAGGCCATATTCATCTGGAAAAATCAGTTAATGCTTCCGAGAGAAGGTGGCATTAGTGCTGCATATTGAA	KB632464.1	30:12078905-12079005	KN271037.1	598:1761451-1761551		7	100.000	98	0	0	-1	0.0375
ss1440341256344	UNALM_VPA_Bovine777K_139	BovineHD0400017394	AAAATGGAAGCATCTGGTTAAATATTAAATAGGAGAGTCATTCTTCTGAGGTCTTGCTTTGCCAGCACTTAGGTAGCAGTTAAGTAAGATGGCCGTTGGCT	KB632464.1	30:8653639-8653739	KN266821.1	705:457214-457314		7	100.000	101	0	0	-1	0.0375	LOC102538224
ss1440341256340	UNALM_VPA_Bovine777K_140	BovineHD0400017438	TTGTGAGTGTTTTCTTTAATACATTACAAAACATCATCTAAATTTGCATCTGTTATAGAATTTGATAGACCTCTCCATACTTCAAATTGGCCTCAGAGATT	KB632464.1	30:8524392-8524492	KN266821.1	705:584464-584564		7	100.000	101	0	0	-1	0.0375	BBS9
ss1440341256263	UNALM_VPA_Bovine777K_141	BovineHD0400021949	GCAGTTGTGGCCACATTCGTAACTGTCTCATTTGCGAATCTCAGCACACCCATTGAGTTTGATGAAGTGGAAAAATTAGGAGCTCAGAAGGTCGCTCAGCT	KB632445.1	11:17475786-17475886	KN268662.1	213:1769351-1769451		7	100.000	101	0	0	-1	0.0375
ss1440341256259	UNALM_VPA_Bovine777K_142	BovineHD0400023195	TGTCAAGAGACTTGTTGGTTACGGGGAACAAATGGGATCATATGTGCAAGGGTACCGAGGACGGTGTGTAGCGCGAAGTGGGGGTTCCGTGAGTGCAGTGG	KB632448.1	14:5887055-5887155	KN269929.1	22:8173093-8173193	22	7	100.000	101	0	0	-1	0.025
ss1440341256392	UNALM_VPA_Bovine777K_143	BovineHD0400026942	TCCCCTCCACTTAGCATTTATATAGCTCTCTGTAATCAGTGGGCAGTTAATCTGCCCAAAGCCCAGAGCTGAGGAAAGAGTGTTTCAGGCTCCCAGGGGCC	KB632466.1	32:10058754-10058854	KN270405.1	728:200414-200514		7	100.000	101	0	0	-1	0.0375	PLXNA4 - PLXNA4 - PLXNA4
ss1440341256349	UNALM_VPA_Bovine777K_144	BovineHD0400026943	CCCCAGTAGGCAGGGGGGCCCTCCTAGAATCCGCTCTTGCTGGGGCACACTTCCTGTTGCCTCAGTTTCTAAGACTTTAAAATGGTAGAGACAAACTTTCC	KB632466.1	32:10060122-10060222	KN270405.1	728:199048-199148		7	99.010	101	1	0	-1	0.0375	PLXNA4 - PLXNA4 - PLXNA4
ss1440341256585	UNALM_VPA_Bovine777K_145	BovineHD0400028218	GTCACGGGAGAGAGGCCATCCTTCCCTGGTAGGTCCCAGGCCCTGGTGGATCCACAGCCCTGTTTCCAATCACAGGAAGCCAGAGGAGATTTGCCCTTGGA	KB632599.1	165:3285797-3285897	KN267161.1	535:2858429-2858529		7	99.010	101	1	0	-1	0.0375
ss1440341256442	UNALM_VPA_Bovine777K_146	BovineHD0400028534	AGCTTGCAAAGGCTGGGTTATTAATGCCTGGTTCCATACCAGGAACAAAGCTTGAGAATAATCGAACAATTGCCCAGGAAGCCGTTTGGATTGAAGTTAGC	KB632539.1	105:488188-488288	KN267161.1	535:3646798-3646898	7	7	100.000	101	0	0	1	0.0375	PTN - PTN - PTN
ss1440341256375	UNALM_VPA_Bovine777K_147	BovineHD0400033242	ATAACAAAAGGTATCTTTCTTGCCCCACTTCTCCCCAGACCCTGACCTGCTTCCAAGAAAAAAAACAAAAGCTTATTAAAAACTATAAATACTTCCAACTA	KB632491.1	57:8927917-8928017	KN270144.1	109:15125700-15125800		7	98.020	101	1	1	1	0.0375
ss1440341256484	UNALM_VPA_Bovine777K_148	BovineHD0400033331	TTGGGAAAGCTACAACAGGGCAACACCTTTGAAAAACATAGCAACAGCTCAGCCGCAGGATTGCTCGGCCTCACTTTGATGACTCTCCAGCGCCACGGTCC	KB632560.1	126:4456282-4456382	KN269242.1	340:815211-815311		7	100.000	101	0	0	-1	0.0375	LOC107034268
ss1440341256493	UNALM_VPA_Bovine777K_149	BovineHD0400033576	TTCTAACACCAGCAACCAATTTTCTTTAGTTTCACGTCATTTAAAAAGTAACAACTTAAGAAAACATTTTTTTATTATCAGAGAAAGTGGCGTTGAGTTTT	KB632560.1	126:3879113-3879213	KN269242.1	340:1377225-1377325		7	100.000	101	0	0	-1	0.0375	XRCC2 - XRCC2
ss1440341256297	UNALM_VPA_Bovine777K_150	BovineHD0400035412	TTTAATGCTTGTGGCAAAATTATGAAAGTCTGGAAATAAATAGTTCTTGAAAAGGTCAAGATTTTACTTTAAAAATAAAGTTAAGAATGGTTTAACTATTT	KB632439.1	5:19001603-19001703	KN269819.1	382:7532755-7532855		7	99.010	101	1	0	1	0.0375	ARRDC3
ss1440341256303	UNALM_VPA_Bovine777K_151	BovineHD0500003249	GACATGTTTTCCAGTTTGGGGGCTGTGTTTTACTTCTCACAAGGACTGGCATTCTGACTGCAGTCTTTCTATGTCCCCATCTCCCTAGCTCTCATGTCACT	KB632441.1	7:8863865-8863965	KN268886.1	364:9073526-9073626	12		100.000	101	0	0	-1	0.0625	PPFIA2
ss1440341256276	UNALM_VPA_Bovine777K_152	BovineHD0500004777	ATGAATGCGTATATTGTAAAAGCCCTATGACAAAATGCCCTATTGTTTTATGAAGTAGGAACACGAACTAGTATTATGAAATTCAGTAAGAGAGTAGTTTC	KB632441.1	7:12433257-12433357	KN268886.1	364:5566972-5567072	12		100.000	101	0	0	-1	0.0375
ss1440341256580	UNALM_VPA_Bovine777K_153	BovineHD0500005799	GAGGGGGATTACTTTCAAAATATATACTTAGCTAAATTTCTTTAAAATTTCATTTCCCCATCTTATCCTCAATATGGTCTTGGTACCAAATTAGCTCCAAG	KB632737.1	303:339106-339206	KN269726.1	149:9036971-9037071			100.000	101	0	0	-1	0.0375
ss1440341256423	UNALM_VPA_Bovine777K_154	BovineHD0500010276	TGGTGTGCTCCCCCCACTCACTGACAGACTCCGATAGCACAGACTCTTTTCCAAGCTTTTCATCTTGAAAAAGGCAATTCGGCTTCCAGAGCCTTTGAGCC	KB632470.1	36:4911297-4911397	KN267589.1	82:887552-887652			100.000	101	0	0	1	0.0375	NELL2
ss1440341256359	UNALM_VPA_Bovine777K_155	BovineHD0500010584	CAAGGATTCCAGCAGTGCTCTCTCCCGAACTTTGAAATCGGGCATCAGTGAAAGTGTGCCTTTAGCATCCTCTGCAATAAAGAGAAAATCGGTTGGTCAGC	KB632470.1	36:4182531-4182631	KN267589.1	82:186167-186267			100.000	101	0	0	1	0.0375	PUS7L
ss1440341256332	UNALM_VPA_Bovine777K_156	BovineHD0500013520	AGATACTAAAGAAGTAAATCAGAAATTAAGCTGCTTGGATTTAGCACTTATTGATCTGGTATTATTAAACCTCTCAACCATTTTCTTGCTCACATTCACCT	KB632489.1	55:2790775-2790875	KN268305.1	130:1226868-1226968	12		100.000	101	0	0	1	0.0375
ss1440341256357	UNALM_VPA_Bovine777K_157	BovineHD0500013631	AATGATCATTTAAAGCTTCTCTTGCTAAAGTATTGGGTTATGAGAAAATTATACCTTCATTAAGATTCATCTTTATCCTTCATCAGCATTTAGTACATACT	KB632489.1	55:2592249-2592349	KN268305.1	130:1029554-1029654	12		100.000	101	0	0	1	0.0375
ss1440341256586	UNALM_VPA_Bovine777K_158	BovineHD0500015596	GAAGTCAGGTCATGAGCAGGAAGTAATGGAGACAAGGCAGTTTCTGAGCTGAAACTCAGACTCAGAGCTGGTTTATTGTTGTCATGACTACGAGTTCCACA	KB632718.1	284:869609-869709	KN267107.1	487:70495-70595			100.000	101	0	0	1	0.0375
ss1440341256573	UNALM_VPA_Bovine777K_159	BovineHD0500016083	CAAAGCTCAGTCCCTTCTCACCACAGAATCCATCAGAAAAACAGAGGTAAGACTTACTCCGGGTCACAATGACACTGTACTTGGTGTCTTCCTCTAAAATC	KB632759.1	325:453775-453875	KN269547.1	1366:235023-235123			100.000	101	0	0	1	0.0375	NEMP1
ss1440341256549	UNALM_VPA_Bovine777K_160	BovineHD0500017970	TACTCACTTTTGGTCTTTTGGGAAGGAGACTCAACAGGAGATGAAATATGTATTTCCTGTGTGGTATCTTCCTGTACTTGCTCTTCAAGGATTGTTGATCT	KB632625.1	191:1933438-1933538	KN268305.1	130:9464412-9464512			100.000	101	0	0	-1	0.0375	ANKS1B
ss1440341256333	UNALM_VPA_Bovine777K_161	BovineHD0500018487	GACGTGGTTTACACCTGGGTGAATGGCACAGATCTTGAACTGCTGAAGGAACTGCAGCAAGTCAGAGAACAGATGGAGGAGGAGCAGAAAGCAATGAGGTA	KB632489.1	55:9590555-9590655	KN268305.1	130:7971326-7971426	12		100.000	101	0	0	1	0.0375	LOC102533919
ss1440341256421	UNALM_VPA_Bovine777K_162	BovineHD0500018903	GAGTTGACCGCACTTTCACTGAAATATCTCACCTCAGTATTGCTCTCAAATGTGGGTGCCACCCTGTCCATGGCTCTGTCGAGAATGTGCAGGAGCCCGTT	KB632489.1	55:8259992-8260092	KN268305.1	130:6646690-6646790	12		100.000	101	0	0	1	0.0375	STAB2
ss1440341256403	UNALM_VPA_Bovine777K_163	BovineHD0500019380	GAAGAAGATGCCGGCACTCTCACGGATTACACCAACCAGCTGCTGCAGGCGATGCAGCGCGTCTATGGAGCCCAGGTACCCTCCTGCCCCTCACCTGGAGA	KB632489.1	55:7032616-7032716	KN268305.1	130:5441428-5441528	12		100.000	101	0	0	1	0.0375	APPL2 - APPL2
ss1440341256390	UNALM_VPA_Bovine777K_164	BovineHD0500021495	CTTCATTTTTTAAAAGAGCGGTATGTTTAAAACAGTGCCTATTAATTTCCCGATATTGATTCTCTGGCTGGGGAAGAGCATATAGTATTCAGCATAGAGCT	KB632500.1	66:2625833-2625933	KN268423.1	414:449819-449919			100.000	101	0	0	1	0.0375	CACNG2 - CACNG2
ss1440341256264	UNALM_VPA_Bovine777K_165	BovineHD0500024166	TCCTGTTAGGACACTTATGACCTGACAGAAAACAGTTACAGTTAGCCCTAATAAAAGACAGACTCCAAGCACCACATCTGTTCTAAGTACAAGCAAATCTC	KB632434.1	0:22388883-22388983	KN268029.1	163:1122718-1122818	5		100.000	101	0	0	-1	0.0375	GTDC1
ss1440341256266	UNALM_VPA_Bovine777K_166	BovineHD0500026105	CAGCAGCTATATAGTCATACCTTGCTAGTTCAAGCCGATCACAAAGTTTTTCCACTTCTTCCATCATTTTAACACGTTCTGCCTCATTGTCAGAAAAGTGA	KB632445.1	11:9795458-9795558	KN268567.1	238:4989652-4989752			100.000	101	0	0	-1	0.0375	DNAJC2
ss1440341256243	UNALM_VPA_Bovine777K_167	BovineHD0500028381	ACAACTGTAAGGACTGAATTTCCAACACAAAGGATGATGAGATTAAAAAAGCAACAGGCAAGGAAGACTTGAGTTTCGCAGGACCTGTTCTTATTTTAACC	KB632453.1	19:9538582-9538682	KN267871.1	34:3093514-3093614	8		100.000	101	0	0	1	0.0375
ss1440341256583	UNALM_VPA_Bovine777K_168	BovineHD0500035728	GTCAGTCACACATACCACACAACCACAAACAAGCACTCTGACTGCAAAATCCTTTCAACAATACATTCCTGTTTCTTGCAGTCAGCAGTTCGCATTAGACC	KB632792.1	358:407865-407965	KN266893.1	145:382867-382967	34		100.000	101	0	0	1	0.025
ss1440341256625	UNALM_VPA_Bovine777K_169	BovineHD0600001553	ATAGTCAAAGCAGTATTGCTTTGTGAAGAAGCACTTTCTAATGGGTAGCCAAAAGAGGACTTCACCCATTTGCTTTCGACTTCTGTGATAGTCTACTACAT	KB632618.1	184:1989631-1989731	KN269726.1	149:6466116-6466216		2	100.000	101	0	0	1	0.0375
ss1440341256562	UNALM_VPA_Bovine777K_170	BovineHD0600005408	AACTGCACAAATCATATCCATTAGCTTCCAGATGAGTGTAAATCCTTAGCTGTAAAATGTTTCAGTGTAAGCTGATTGCTGAGAGGAGCTCTGTGTGGCGT	KB632723.1	289:644106-644206	KN270034.1	768:275262-275362		2	100.000	101	0	0	1	0.025	DDX10
ss1440341256602	UNALM_VPA_Bovine777K_171	BovineHD0600005901	GGGATTAAAGTCATTGTGAAATGCAGAACAATTGCTTGGCAATCAACCCATGTTCAACTTAGAGGTGTGCCTAGTTATGACAGATCAAGGAACTTTTGTGC	KB632674.1	240:1159942-1160042	KN268387.1	1:9322528-9322628		2	99.010	101	1	0	-1	0.0375
ss1440341256458	UNALM_VPA_Bovine777K_172	BovineHD0600008581	TCTTTAGGACATCTTATGCAGATACACTTCCCTCCTTTCATTCTGTAAGGATAGCATTGCTGTTGCTAAACTGATACTTGCATAGAAAAGTGGCTCAGTGA	KB632522.1	88:4712924-4713024	KN268387.1	1:16240087-16240187		2	100.000	101	0	0	1	0.0375	UNC5C - UNC5C
ss1440341256373	UNALM_VPA_Bovine777K_173	BovineHD0600013317	AAACTGAAACAGGTGTGGGAAAACAGGTGGTCGCAGCCAAGCCAGGGAAGGACTGGAATTTATTGTGGGGAAGCAACATGATAAAATACCACCATTGGCAC	KB632499.1	65:4347721-4347821	KN270273.1	103:6931351-6931451		2	100.000	97	0	0	-1	0.0375
ss1440341256374	UNALM_VPA_Bovine777K_174	BovineHD0600014206	CTAGGGCTGCCCGAGTCCACCGCCACTATGACCACGTTGAACTCCCGAGTGGTCTCATAGTCCAAAGGGGCAGACGTGTGCAGAAAGTACTTTTTCTTGTT	KB632499.1	65:1980819-1980919	KN270784.1	111:6944872-6944972		2	100.000	101	0	0	1	0.0375	PCDH7
ss1440341256467	UNALM_VPA_Bovine777K_175	BovineHD0600014878	CTAGAAATGCTCTGTCCCTTTTTAAAATTTTCTTTGTCATCTTCTTTCCTTTAACTCTTCTCAGGTAGAATTGTTCCTCTATTTAAATACTTATACTTAAA	KB632528.1	94:4369599-4369699	KN270215.1	183:3026046-3026146		2	100.000	101	0	0	1	0.0375	PIK3C2A
ss1440341256511	UNALM_VPA_Bovine777K_176	BovineHD0600016178	GGCACAGCCTTGCAAGGAGTCATGCCACCAAAAGAGAGGAAAAGCCAGATTTCCAAAGGTGGGAGCTACGTCTGTAACTGGAACAACCAACCAAGTGATGC	KB632571.1	137:882484-882584	KN267802.1	3:382361-382461	35	2	100.000	101	0	0	-1	0.0375
ss1440341256450	UNALM_VPA_Bovine777K_177	BovineHD0600016759	CTTTTTGCTGGATTTACTTTGCTGCCTCAAGACTGAGAGGTAAGAGGCTGGTAAGTGTGTAACTATCCTGACTCATCTGGGGCACTTCTTTGGTGGGATGT	KB632534.1	100:3918043-3918143	KN268313.1	456:183493-183593		2	100.000	101	0	0	1	0.0375	CHRNA9
ss1440341256474	UNALM_VPA_Bovine777K_178	BovineHD0600017215	TTTTTCCTATTCACAGTGGTATTTCTCCTCTACATGATAATTTCTAAGACATGTTTTTTAAGAAACAAAAATTTAGGCCATCAATGGTGAGAGCCAACTTC	KB632521.1	87:4676540-4676640	KN269576.1	191:3804947-3805047		2	100.000	101	0	0	1	0.025	KIAA1217
ss1440341256226	UNALM_VPA_Bovine777K_179	BovineHD0600019304	GAGAAGTGATAAATTTGGAGAAATTAAGGAAGACTTCATGGAGGAAATAACATTTGAAACATGTCAAATAGAACGAGTAAGAGGATAATAAGCATTCAGAT	KB632436.1	2:20284700-20284800	KN270912.1	104:4008306-4008406	13	2	100.000	101	0	0	-1	0.0375	YTHDF2 - YTHDF2
ss1440341256309	UNALM_VPA_Bovine777K_180	BovineHD0600019463	ACCTCATGAAGAGCCCTCAAGGGAGTTACTACATTATTACTGTTCCCACCTGGCAAATGAAAACTCTAAAAGCAGGCCTCTCACTACGTTAGTTTACAAGG	KB632443.1	9:4539746-4539846	KN270052.1	1160:830689-830789	2	2	100.000	101	0	0	-1	0.05	SCFD2
ss1440341256302	UNALM_VPA_Bovine777K_181	BovineHD0600019890	ATACGTAATCCCCATGTACGGACACCCTTTGGAGAATTCTTTACTTCCTGTCCAGAGCAACAAGCTGGCCACAAGGGGGAAGCATCACACAGAGAGAGCGC	KB632443.1	9:5553149-5553249	KN267800.1	245:3227954-3228054	2	2	100.000	101	0	0	-1	0.0375
ss1440341256267	UNALM_VPA_Bovine777K_182	BovineHD0600020282	AAATGAAATACAGGTAGTATTTTAAAATTTAAACCTGTATACGTTTCTACCCAGCTAATATTCTTTGCTTACTTTCCTCTGCTTTTTTCATACCTTTTTAC	KB632443.1	9:6780073-6780173	KN267800.1	245:2031644-2031744	2	2	100.000	101	0	0	-1	0.0375	LOC102529802
ss1440341256452	UNALM_VPA_Bovine777K_183	BovineHD0600021967	ACTAATGGAAGAAAGGGCAGAGGCTTTACATCTTTCCTGTATTCCATCTCGCTGTGAAGTCAATGGGGCGAGAAATATAGGCAAGTACAGAACAAAGATTC	KB632537.1	103:880543-880643	KN268387.1	1:24880145-24880245		2	100.000	101	0	0	-1	0.0375
ss1440341256247	UNALM_VPA_Bovine777K_184	BovineHD0600028519	AGAGGATTAATGAAGGGGAAAGGTTGGGAACGGAATGCCAAGTTCACTGCTGAGTTAATTCAGTAACAAATGCATCTGGGCATCCGTGCTAATAATGTTCC	KB632443.1	9:10441018-10441118	KN266925.1	722:1752313-1752413	2	2	100.000	101	0	0	-1	0.0375	ARHGAP24
ss1440341256505	UNALM_VPA_Bovine777K_185	BovineHD0600032617	CCCATAGATGATGGCTTGCTGGATGATGGTCATAATGATCAAGTTGGTGTTTTAAATTCACCCACATGTTACTCAGCTCATCAAAATGGAGAGCGAATAGA	KB632514.1	80:1758382-1758482	KN270554.1	982:298841-298941	2	2	98.020	101	2	0	1	0.0375	CPEB2
ss1440341256238	UNALM_VPA_Bovine777K_186	BovineHD0700000146	ATGTCCAGGGGTTCCCTGAATCTGCGGGGGCCCAGGAGATCTGGGCCTGCAGGGAGGAGCCCTGAGGTCTGGAGGCCCAGGGCCTAACATGATGGGGCCAC	KB632438.1	4:15021447-15021547	KN269500.1	324:2390560-2390660			100.000	101	0	0	-1	0.025
ss1440341256311	UNALM_VPA_Bovine777K_187	BovineHD0700000156	ACTCCTTCCAGCCTCCTGTGGCTGGAGGACCTGGTGGAACTTTTGAAGCCATGAAAGGCCTCTGTCTGACTTTACTGAGGGATGCTGGGGTAGGCTGGGGT	KB632448.1	14:240321-240421	KN266814.1	454:1105737-1105837	22		100.000	101	0	0	-1	0.0375	GFPT2
ss1440341256387	UNALM_VPA_Bovine777K_188	BovineHD0700004573	GTCTCTGTGAGCTGTTACTAATCGGCTTGGTTTAAAAATTACCTCAGACCACAGCCACCAGGAAGTTTGGTGGCTCATGGGTGAACCTGCTCCTCCTTGGG	KB632494.1	60:2813154-2813254	KN269525.1	85:6139217-6139317	22		99.010	101	1	0	-1	0.0375	DNM2 - DNM2 - DNM2
ss1440341256570	UNALM_VPA_Bovine777K_189	BovineHD0700008534	AACAAAAGCAGTGGAGAAAACTTAAACCCCTATGGTGGCTGGTAACTGGCCACCATCTGGCTTCCATAAATCCCTTGGAAGTGGAGAAAGCATTTCAGGTG	KB632717.1	283:964089-964189	KN269130.1	180:3583417-3583517			100.000	101	0	0	1	0.0375
ss1440341256568	UNALM_VPA_Bovine777K_190	BovineHD0700009145	TTCCAACCACAGACAAGAGAAACAAGTATGCACAACAGAATCTGAACACACTTGCTAGCAATGATGGATTTAAGTTATTAACAGATCAAAAAGAGATGGAT	KB632689.1	255:863725-863825	KN269130.1	180:5105605-5105705			100.000	101	0	0	1	0.0375	SNX24
ss1440341256455	UNALM_VPA_Bovine777K_191	BovineHD0700010573	TTAACACATTTCAAATGAAAACAGTTTAGATTTTTGTTTCCAGGAAACACACATTGGATAGGACTTGTTTAGCACTCAAATAAGTGATTCATGTGTTGTGG	KB632552.1	118:447300-447400	KN267750.1	10:915311-915411			100.000	101	0	0	-1	0.025
ss1440341256254	UNALM_VPA_Bovine777K_192	BovineHD0700011640	GTTTTGGCAGCGCCCTCCAGCGGGACACACGGTGGGGTGGCACTCATAGAGCAGCATGCGGTTGATGCACTCAGAGTCGATCCCACACGGGTTCTCATCAG	KB632448.1	14:2125767-2125867	KN269929.1	22:11872646-11872746	22		100.000	101	0	0	-1	0.0375	NSD1
ss1440341256234	UNALM_VPA_Bovine777K_193	BovineHD0700011827	AGATGAGGGGGCTGGTGAAAATGTTTTTCTCCACATCAATCACCCGGGTCCTTGCTGTGCTGAGAATTTGGTAAGGCCTCATCAGAGCTCCTGCCAAGAAT	KB632448.1	14:1634465-1634565	KN269929.1	22:12356149-12356249	22		100.000	101	0	0	-1	0.0375	COL23A1
ss1440341256386	UNALM_VPA_Bovine777K_194	BovineHD0700018217	GAATCTGCACTGCTCACCCGAGGCTGGCCAGGCAGGACTGAGATGAGCTCACACAGCTTGGCTGTGTTGGGACCAGCCGCCCACAGTTGCACGCAGACCGC	KB632461.1	27:1532004-1532104	KN270284.1	250:641271-641371	18		100.000	101	0	0	-1	0.0375	PRKCB
ss1440341256485	UNALM_VPA_Bovine777K_195	BovineHD0700022435	ATGGAAAAGACTCTATGCAAAGCACTTACTCTGTGCAGAGTGAGGGACATCAGCAAGTCATGAGGAGAGTGCTTAGGGCTGGGCGATTAGACGTGGCACCC	KB632551.1	117:3256687-3256787	KN266850.1	17:3216923-3217023			100.000	101	0	0	1	0.0375
ss1440341256321	UNALM_VPA_Bovine777K_196	BovineHD0700022980	TCATTAAGGTAAAAAAAAAAAAAATCAATGAGCTTGAAATGAAAGTGTTGATATTATTGTAAGCTAAATCTACTTCTGAATAACTTACTCCCTCCATAACA	KB632448.1	14:11817192-11817292	KN269929.1	22:2333504-2333604	22		99.010	101	0	1	-1	0.0375
ss1440341256273	UNALM_VPA_Bovine777K_197	BovineHD0700023109	TCTCTGATTTTATGCTCTTTTAGTCTCCTGCTCAACCATCCACTAACAAGCGGTGATATTAGCCAATAAATCAAAGACGTCTGCTTGTCACCGCCAGATGC	KB632448.1	14:11475902-11476002	KN269929.1	22:2671098-2671198	22		100.000	101	0	0	-1	0.0375
ss1440341256258	UNALM_VPA_Bovine777K_198	BovineHD0700027359	GCAATTTAAAATTTATTGTGAGAGTTAAGACATGTTTATAAAACAGTACTAGTAGGTGATATGTTATCAATGACAAATGTATGCCATGAATTCTTTCAAGT	KB632439.1	5:19416716-19416816	KN269819.1	382:7942178-7942278			100.000	101	0	0	1	0.0375
ss1440341256473	UNALM_VPA_Bovine777K_199	BovineHD0700030829	GAGGCCTGACAGTAAGTCATGTAATACATCGATGAGTTTATGGGTTTCTCGGTTAGTAATTCCAGATGGTGTGTCTGTGCTCCGGCTGTGCACTCTGTGTA	KB632511.1	77:3512847-3512947	KN269130.1	180:19279315-19279415			100.000	101	0	0	-1	0.0375	LOC107033879
ss1440341256438	UNALM_VPA_Bovine777K_200	BovineHD0700031614	ACTAGAGTCAACCATAAAACAGACCCTAAGGAATGTCTGAAGATCTAACTTCTTTTGTTTTACATTTGATATCTAAGGTGTATTTCTAGCAAATTCCTCAA	KB632511.1	77:5675369-5675469	KN269130.1	180:17164970-17165070			100.000	101	0	0	-1	0.0375
ss1440341256236	UNALM_VPA_Bovine777K_201	BovineHD0800003284	TTAACTTCTTCTGCCTCTTACTTAAATAGAAAATATAAATTAGCACAGTCTTCTTGATTACTGAAATGACCCCAACTATTATGGTTGCCCAGTTGATACAA	KB632442.1	8:6991532-6991632	KN267179.1	194:302189-302289			98.020	101	2	0	-1	0.0375
ss1440341256399	UNALM_VPA_Bovine777K_202	BovineHD0800005308	TCTGCACGTTGTTCCCTTGGCTGTTCCAGGTGTCACACGGTGGCCACACGTAGCTTTCCTTTTGGTTCTTTTATCTGACGGCTGTCTGAGCTGTGCCCAGG	KB632456.1	22:454972-455072	KN267108.1	41:5857067-5857167	13		100.000	101	0	0	-1	0.05	ST3GAL3
ss1440341256571	UNALM_VPA_Bovine777K_203	BovineHD0800007912	GGGCCCGAACTCAGTTCGTCCAGCCCCGCCCACAGCACAAACTGCCTTGCAGCACCCCCCATGATTGCTTGCTTGGCCACTTCTGAAACAGAAACCAGCTC	KB632654.1	220:2300073-2300173	KN267053.1	567:1447192-1447292	21		100.000	101	0	0	1	0.0375	LOC102543273
ss1440341256427	UNALM_VPA_Bovine777K_204	BovineHD0800009632	TGGACAGGAAAGTGCTTGAAATGTGATTTTGCATTTGTGTTGCTGTTTTATGCTTCTTCCATCTCCACCAGAAAAACATGGCACTGGTCTACGGAGAAGAA	KB632517.1	83:6832711-6832811	KN270853.1	16:981699-981799	4		100.000	101	0	0	-1	0.0375
ss1440341256381	UNALM_VPA_Bovine777K_205	BovineHD0800009700	TTTTCTAATACTTTCTAAAGTCTGACTCTCTCTCATATTGGTAAACTATAGTAGTTGAGATATGTATCTGCTAATAACCTTCTGTTCCACTGTTCAGTGAA	KB632463.1	29:5196812-5196912	KN270091.1	283:9240753-9240853			100.000	101	0	0	-1	0.0375
ss1440341256377	UNALM_VPA_Bovine777K_206	BovineHD0800011186	TGTCAGTATGCTTAAAAGTGCATTTGACTTTTAATTTTCTTTTAAAATCTAAGCATTTTGGATCCTCTGTTGTACCCAAATCTAGTTACTTAAAAATAGAA	KB632481.1	47:6328911-6329011	KN268663.1	205:4178225-4178325			100.000	101	0	0	-1	0.0375	ERG
ss1440341256472	UNALM_VPA_Bovine777K_207	BovineHD0800011194	GAATGAATTACATTATGGAGTCTTCCCAACTGCAGCTTAAATCATTTAAGCCTTGTTTGGTATGGCACCTGCTGCTCACTTATTTTTAGGAGAGAAAATGT	KB632515.1	81:3952065-3952165	KN268897.1	239:1594463-1594563			100.000	101	0	0	1	0.0375
ss1440341256504	UNALM_VPA_Bovine777K_208	BovineHD0800011912	GTTTGCATGCTCCCCTCTGCCTTTTCTTCCCTTTTAACGTCCCAAGAGTATTAATCCAGGCTGCCCTGGATCAACAGAGTGAGAAGACATACCGTCTTGTT	KB632515.1	81:1836958-1837058	KN270136.1	939:453815-453915			100.000	101	0	0	-1	0.0375	SLC1A1
ss1440341256512	UNALM_VPA_Bovine777K_209	BovineHD0800012047	ACACTTTTCTGGTAAGTTTATTCTTACTATAGCTATGGATCTGTAAATATTCATTCTCTATCTGATGAGCAGGATGTGGGGGAGGGGGCTGTCACAACAAA	KB632515.1	81:1577382-1577482	KN270136.1	939:709310-709410			100.000	101	0	0	-1	0.0375	LOC107033893
ss1440341256469	UNALM_VPA_Bovine777K_210	BovineHD0800012228	GTTTTTCATAGAGAAAAGGCAGGGGGGAAAGATAAAAGAATGTAAGCAGATCTTGTGAAATCATTCATATTTATATAGAACTTTCTGTTTTCAGTGTGCAT	KB632515.1	81:1173276-1173376	KN270136.1	939:1116994-1117094			99.010	101	1	0	-1	0.0375
ss1440341256546	UNALM_VPA_Bovine777K_211	BovineHD0800013095	TACTTGTAATCCTTCCCCCTCCCTTTCCAGTTTCTTTGATGATTTTTCCCATAAGTGTCTAAGCCGCGGGGACTTAGTAGAAGCAGGCTGCTCCTCCTGTG	KB632713.1	279:1297125-1297225	KN268817.1	506:298585-298685			100.000	101	0	0	-1	0.0375	DMRT3 - DMRT3
ss1440341256370	UNALM_VPA_Bovine777K_212	BovineHD0800017349	AATGCAGCTGTATCTCAGTGGATGCCCGTTTTATTACTCATCCTTAGAAATTGGACTCATGGCTGACTAGATTTATGGAGTCTTGAAACGATATAAAAATG	KB632476.1	42:8999089-8999189	KN268905.1	562:1130098-1130198	4		100.000	101	0	0	1	0.0375	TLE1
ss1440341256408	UNALM_VPA_Bovine777K_213	BovineHD0800017875	CTGGTTCCCAATTTAAATCCTTGCAGGGATCTTCGCCTAGAGACAGATGAGTCAAGATGGAAATTCAACATGAGACACTGACACTCACGCAGAGTTGTGGG	KB632476.1	42:7536365-7536465	KN267573.1	170:323724-323824	4		100.000	101	0	0	-1	0.0375	UNC13B - UNC13B
ss1440341256339	UNALM_VPA_Bovine777K_214	BovineHD0800018306	ATCAGAATGGAGGGCACGCTCTTAAAGGGTCACAGCCCACCGCAGATCTCCACTCCTTTAGCGGTAAGTGGCGGAACATATTTTCTCTGCTAACACTACTG	KB632476.1	42:6488897-6488997	KN267573.1	170:1365333-1365433	4		100.000	101	0	0	-1	0.0375
ss1440341256365	UNALM_VPA_Bovine777K_215	BovineHD0800018474	ATGGGCTGAGAGGTCTCACCATAGCAGAGAAGAAACAAAAGGGAAAGGGGACTAAATCATTATGGCAATTAATTGACTGACAAAAATCAAGGCTGAACTAC	KB632476.1	42:6035364-6035464	KN267573.1	170:1817191-1817291	4		99.010	101	1	0	-1	0.0375	ZCCHC7
ss1440341256378	UNALM_VPA_Bovine777K_216	BovineHD0800021444	AACCCCTGCGTTTCCTGCATTCTGTTTTATTTCTTTGTTTACAGATGTTGCAATTAATGCTTTGGGAGGGATGGGTGGGAAAGAACACGCTGGCTAAGCAT	KB632471.1	37:8200750-8200850	KN270976.1	377:3718455-3718555	31		100.000	101	0	0	-1	0.025	LOXL2 - LOXL2
ss1440341256481	UNALM_VPA_Bovine777K_217	BovineHD0800025299	TTTCAGACGCCATACAATAAAGCACTCCATTTACTTTTCAGAAAAGTTCATAGGGAAACGGAAGTAGACTCATAATACCCAGAAGAAATTGTTAAGAATAC	KB632527.1	93:168743-168843	KN270154.1	95:6423833-6423933			100.000	101	0	0	-1	0.025	ZNF484
ss1440341256437	UNALM_VPA_Bovine777K_218	BovineHD0800025717	GCACGGTGTGCAGTGGCCTGGGACCAGAGCCAGTGGAGAATTTGGCCTCGAGCCAGGCTGACTCAGATGCACAGCCTTGTCACTGTTGTCACCTTTCTGCC	KB632527.1	93:1409466-1409566	KN270154.1	95:5200997-5201097			100.000	101	0	0	-1	0.0375
ss1440341256371	UNALM_VPA_Bovine777K_219	BovineHD0800027385	AGTAGTTACAATGAATTGGAGGCAGTGGAGATAAGAGGCCAATTAAGATATGAGTGAAAAGTATAGGCAAAAATGGTGATGGCCCTAATCAGGACAACAGC	KB632476.1	42:2249576-2249676	KN267573.1	170:5559759-5559859	4		100.000	101	0	0	-1	0.0375	PLPPR1
ss1440341256539	UNALM_VPA_Bovine777K_220	BovineHD0800028614	CAGAATAGGACCAGAGCAAAGAAAGTCCAAAAGGGTTGGAAGACTAGCAGTGGCAAGTGAATGAAGACCTTGCCGGCCACGTGGAACAAGGCGATGGTGAG	KB632606.1	172:3254604-3254704	KN267573.1	170:8368745-8368845			100.000	101	0	0	-1	0.025	SLC44A1
ss1440341256594	UNALM_VPA_Bovine777K_221	BovineHD0800028802	GCAGTTACATGGTTCTTAGACTCTATGAAATAAAGGAAAGATTTAAACTCTCCAAAAGACACTCAAGTAGTCAGGAAAACAGACCTTTCTCATGTCAGTAG	KB632667.1	233:1333591-1333691	KN267665.1	57:145982-146082			100.000	101	0	0	-1	0.0375	ANKRD44
ss1440341256316	UNALM_VPA_Bovine777K_222	BovineHD0900006697	AGCAACAACATGATACATCTTGGTCTTCTTCCAGCATCAGCGAGCGTTCTCGCCAAAAAGCAAGAAACAGTATCTGAAATGTTTGAAAGGCAAGAGGCCGT	KB632453.1	19:745535-745635	KN268926.1	28:11357968-11358068	8	8	99.010	101	1	0	-1	0.0375
ss1440341256280	UNALM_VPA_Bovine777K_223	BovineHD0900007613	ATATAAGTCAATAGCAGGTGGGAAATGGACACCTGTTTCTAGAACAGAGAAGATGGCTGTGCTGAAGTTCATGACTATTATCAGAAAGTAAACGTTAATAA	KB632453.1	19:14829444-14829544	KN271046.1	96:550560-550660	8	8	100.000	101	0	0	-1	0.0375	TRDN
ss1440341256574	UNALM_VPA_Bovine777K_224	BovineHD0900012516	GTGAAACCCCAGACTTGGACTTGAGCCAGCTACCTTTCAGCACCACATCATTAAGAACTCTTGGAGGTGCTGTTTAAATGTAAATTTTCCAGCCCTGCTTC	KB632656.1	222:385745-385845	KN269810.1	77:7707585-7707685		8	100.000	101	0	0	1	0.0375
ss1440341256268	UNALM_VPA_Bovine777K_225	BovineHD0900014220	TCCCACAGTCTTTGCCTTATCAGGAGCTCTGCTGGAGAAAGTCAGGAAACTGTGAACTTGCACTTGCTCACCTCAGTGCTCCCCGTCAACCCCTTTATTTA	KB632455.1	21:2657602-2657702	KN269810.1	77:12549596-12549696	8	8	100.000	101	0	0	1	0.0375	FBXL4
ss1440341256298	UNALM_VPA_Bovine777K_226	BovineHD0900015988	GTTTTTTTTTTAATTACAGAAGACGCAAATAAGTAAATTCTCCACGACTGCTCTTGAAGGACATAAACCAAACAGAATCAGAATTAGTCAACTGCAGTCAA	KB632455.1	21:7531299-7531399	KN269972.1	467:2635524-2635624	8	8	100.000	101	0	0	-1	0.0375
ss1440341256328	UNALM_VPA_Bovine777K_227	BovineHD0900017349	TGCTAATGTATTACTGTTAACTCAAAAGTCTTATTCAGAAGTAGAATAATCTCTTTCAGCCTAAAGTAAATTCCTTCAGCTATCAATCAACTTAAATTTAC	KB632455.1	21:11300636-11300736	KN270954.1	1024:1081716-1081816	8	8	100.000	101	0	0	1	0.0375	ORC3
ss1440341256324	UNALM_VPA_Bovine777K_228	BovineHD0900018760	CTCCTAATCTGTAGAATGCTGACTGCCCTGCAATATCCAGCTACCTAAACTTCCCTCAATCCAGCTTTTCACTCTTAAATTCAGTAAAGTCATTGTGTTTT	KB632453.1	19:2382652-2382752	KN268926.1	28:9731307-9731407	8	8	100.000	101	0	0	-1	0.0375
ss1440341256308	UNALM_VPA_Bovine777K_229	BovineHD0900020075	TTTTCTCTATTTTTTTTGCCAGCTGTGCAAATTTTTATAAAACAGCTTCAATATGAATCTTTTATGACTGTTCTCCAGTCATCTGAGTTATACTAAGCACG	KB632453.1	19:5638952-5639052	KN268926.1	28:6523816-6523916	8	8	100.000	101	0	0	-1	0.0375
ss1440341256294	UNALM_VPA_Bovine777K_230	BovineHD0900021315	ATGAGGGTGGTGTTAACAAATGTCTAAACCATGTAAAACCCAGTTAGCTGATCAGAATATCAGCATTACAGGAACTGGTTGAACAGGCAGACAAGAAGCAG	KB632440.1	6:20378753-20378853	KN268926.1	28:2964596-2964696	8	8	100.000	101	0	0	1	0.0375
ss1440341256257	UNALM_VPA_Bovine777K_231	BovineHD0900021433	CAAAAGGACACAGAATTTCCTCCAATTGCAAGGAACCAAGACAAATGTCACATTTCCTGGCTGCCCACTCGACTCACCACACCCCCTCCCCCAGCTCCCCT	KB632440.1	6:20159676-20159776	KN268926.1	28:2751097-2751197	8	8	100.000	101	0	0	1	0.05
ss1440341256360	UNALM_VPA_Bovine777K_232	BovineHD0900023495	CCGCGCAGAGCCGGCTGGCCGGAGCAGGCCCTGAGTTGAACTGCCAGGTATGTGGGAGCTGCTCTGGGGTCTGGGGTCTGTGGGACTCGGCCCAGCACCCA	KB632478.1	44:7708178-7708278	KN267879.1	707:429317-429417	3	8	100.000	101	0	0	1	0.0375	PCDH1
ss1440341256456	UNALM_VPA_Bovine777K_233	BovineHD0900024099	AGGCTGCAGTAGATAATAAGTATTGTATGTCCTGAACTTCAGAAGAATTAAAAGCACAATTTTCATTAATAAAAAATGTGCTTATTTGATCTTAAGACTTA	KB632507.1	73:4298514-4298614	KN270144.1	109:2399770-2399870	3	8	100.000	101	0	0	1	0.025
ss1440341256249	UNALM_VPA_Bovine777K_234	BovineHD0900025203	GGTCTAGTTGAAATACTATTTATTATTTTAAGGTTTTTCAAGTATGTCCTCTTCATTTCCAATGCAACTGGATGGATAAAGGCCAAATCCTTAGTCCATAT	KB632440.1	6:10281602-10281702	KN268544.1	415:1362879-1362979	8	8	100.000	101	0	0	1	0.0375
ss1440341256271	UNALM_VPA_Bovine777K_235	BovineHD0900025458	ATGGTTAGTTTAGATTATGGCTTAGAGTGGAGACCACAGTGTAAACCTATTGATTAGAGCTCTCTGGTTCCTGTGAAAAAAAGCAGTAACAAAGTGGTGGT	KB632440.1	6:9638638-9638738	KN268544.1	415:736440-736540	8	8	100.000	101	0	0	1	0.0375	ESR1
ss1440341256323	UNALM_VPA_Bovine777K_236	BovineHD0900026270	TTAACTTTTGGCATCTTTGGTACCACAGCTGGTACCAAAGCTGAAGAAAATCCACAAAGTGAACCACAGTACTGATGCCACTGACAGCAGTGGATAGTCAT	KB632440.1	6:7589827-7589927	KN269191.1	661:1281956-1282056	8	8	100.000	101	0	0	-1	0.0375	SCAF8
ss1440341256325	UNALM_VPA_Bovine777K_237	BovineHD0900028759	GATGAGGACATTTGGATTTGCTTTCACACAAACTCTCCATTTCTTTCCATCAGCCCTTCAGTCCCTCATTCACTCCAGTGGGACTATCTGTTCACATCCTC	KB632445.1	11:15285480-15285580	KN268662.1	213:3931228-3931328		8	100.000	101	0	0	-1	0.0375
ss1440341256418	UNALM_VPA_Bovine777K_238	BovineHD1000002619	TCCCCTCCAGGGCAACGAAGGCCGAATGTCAATGTTTACTGAGTGACTGACTATTTGATGATAGCTGGTAGATGGCCTCCAGTAGCCCCAGTCCCTAAAAG	KB632484.1	50:2509719-2509819	KN270379.1	557:1616612-1616712	1		100.000	101	0	0	-1	0.0375
ss1440341256278	UNALM_VPA_Bovine777K_239	BovineHD1000003381	GAAATACTTGAATAGCTGCAAAAATACTTCATTTCCTTCCCCTAGACACGTAGAGAAAATTTTAGGAGCTGAACTTTTTTGTGAGTTGCTATTACTTCCAA	KB632439.1	5:10009450-10009550	KN270144.1	109:25533527-25533627			100.000	101	0	0	1	0.0375
ss1440341256464	UNALM_VPA_Bovine777K_240	BovineHD1000004048	GGAGGTTGGTGTGGGGTCGGGCAGGGCCTGGGAACTCCGTGGGCTGCCCACAGCCATGACAGTTCCTTGTCCTCTCCAAGTCCCAGAGGGACATTCATTGT	KB632532.1	98:4136840-4136940	KN268564.1	189:2516863-2516963	6		100.000	101	0	0	-1	0.0375
ss1440341256620	UNALM_VPA_Bovine777K_241	BovineHD1000006742	AGTACTAAAACCCCTTTACCTAATAACGTCAAAAGGCCATCTAAGTTAGTGAGATTCAAAGCTAAGTTTTGCCCTCATTTTTCAAATACATGTACAAAACT	KB632719.1	285:1431288-1431388	KN271015.1	209:1421565-1421665	6		100.000	101	0	0	1	0.025	GMPR2
ss1440341256402	UNALM_VPA_Bovine777K_242	BovineHD1000009675	AATAAACAGTTTTAAGTACATCTTCTACCCTCTAAACAGTTCCCATATCACTGAAGAGCAGCTGTTTCAGGATCCCAGGTGGCTCGTAGAAGCACAGGCTG	KB632463.1	29:988637-988737	KN270091.1	283:13403622-13403722			100.000	101	0	0	-1	0.0375
ss1440341256362	UNALM_VPA_Bovine777K_243	BovineHD1000009745	TCTGACTGACAGACAGGATGGATGGGTGGGGAGAGCCTGGGGCCATAGCTTGGGTGAAAGAGCACAAACAGAGCCTGAGAGAGAATGGAAACAGTGAATGG	KB632469.1	35:11589536-11589636	KN269370.1	116:14081226-14081326			100.000	101	0	0	-1	0.0375	MME - MME - MME
ss1440341256497	UNALM_VPA_Bovine777K_244	BovineHD1000015941	CCATGGTCCAGGAAGACACTTCTCGCTTGGCCTTTTCATCTTCTGGAAGATGGATGGATGGAAGAAAGAAATGCCTCAGGGGTCAAGCCTCTAAGCAGCAG	KB632522.1	88:1871437-1871537	KN268387.1	1:13464576-13464676			100.000	101	0	0	1	0.0375	METAP1
ss1440341256279	UNALM_VPA_Bovine777K_245	BovineHD1000019533	AAGGTGGCTCATGTTTCAGCCAGAAATCAGACGAGGAATAGAAGCAGGTTTAAAATTGGCAAAATGCTGCAGCACTTTCTCAGTCTCTTGCCAGAGGCTTT	KB632451.1	17:4932311-4932411	KN270801.1	582:1033558-1033658	6		98.020	101	2	0	-1	0.0375
ss1440341256534	UNALM_VPA_Bovine777K_246	BovineHD1000021579	ATTCTACTGAGAAATGTCTTCAATATAAAAGAAGTCAAGGAATTCAGAAACCACTGATTCTTACCCTTCTCATGATTGAGATGGCTTCTGTAGATAAGAAC	KB632818.1	384:131175-131275	KN269295.1	291:753515-753615			100.000	101	0	0	-1	0.0375	PKN2
ss1440341256334	UNALM_VPA_Bovine777K_247	BovineHD1000021832	AGGTCTGGATTACAAGTTCTACCCCCAAGAAAAAGAATCAGGTTCAGAAAACACTTCCAAAAGGTTCTCCAAAGCAAAACACTTGTGGTTGCAGGGCCGGG	KB632466.1	32:8248912-8249012	KN270033.1	14:13105248-13105348			100.000	101	0	0	1	0.0375	UBE2H
ss1440341256398	UNALM_VPA_Bovine777K_248	BovineHD1000025431	CTCCTTCCCTGTGCTCTCATGTGTTTGCTTTTTTGCTTTGTCAATGAAGATGCCGGCATGTTAATTACCAGGCCTGTCCCCCGCAAGGCACCTCAGCATCT	KB632492.1	58:2714409-2714509	KN268954.1	307:4622120-4622220	X/Y		100.000	101	0	0	-1	0.0375
ss1440341256364	UNALM_VPA_Bovine777K_249	BovineHD1000026831	AGTTATCTACATTGAAGGGCAGCTGCCAGATTAGAATAGCAGAGGGTTTATGAAGATATATAAAATCACTTGGTAAAGTGGTTAGGACAGGAAAAGGAAAA	KB632492.1	58:5603889-5603989	KN268954.1	307:1747908-1748008	X/Y		100.000	101	0	0	-1	0.0375	CEP128
ss1440341256535	UNALM_VPA_Bovine777K_250	BovineHD1100005634	AAAATGATGCTTATACTATGATACACACAGTGTCACTTTAAAGTGCCACAACATATTACTTGGGTTAACGTGAAACTCTCATACGAAATTTGTGTGGTTGT	KB632649.1	215:474843-474943	KN270263.1	744:1637689-1637789			100.000	101	0	0	1	0.0125
ss1440341256608	UNALM_VPA_Bovine777K_251	BovineHD1100005755	CGACCCCGTGTGGCTGGACCTCACGTGCCCTGAAAGCCATTGGAAAGGCATGCGTACCAGCATCTTCCCATTTGCCACCACATCCTCCACAGCCTGGTTGC	KB632649.1	215:813993-814093	KN270263.1	744:1974654-1974754			100.000	101	0	0	1	0.0375	CRIM1
ss1440341256530	UNALM_VPA_Bovine777K_252	BovineHD1100005767	CAAACCTCACTAAATTTTTTGCTTTCAATCCCTGTTGGTTGGCTGTTAAATTATTTTAAAGTATAATGTTCTGTAATAGAAAAACATAAAAGCATTTGTCT	KB632649.1	215:836230-836330	KN270263.1	744:1996891-1996991			100.000	101	0	0	1	0.0375	CRIM1
ss1440341256503	UNALM_VPA_Bovine777K_253	BovineHD1100006916	AGGCTATGGATGTTGCTAGATTATTTGTTTTCAATGACTGCAGGGAAAAAATGCCATTTTGCCAAGCTGGCACCCGTGTCAGATGAACAGAGGGTCTCCCC	KB632564.1	130:3745203-3745303	KN270207.1	143:2327300-2327400			100.000	101	0	0	1	0.0375	SLC8A1
ss1440341256524	UNALM_VPA_Bovine777K_254	BovineHD1100007519	ATATGCTACTATGATTTCCAAATTCAAACAAATTTGAGAACAAATTTTCAGAATTTCTTTAGGCTTACAGATATATTCAGGCATAAAGAAATAAGAAAATA	KB632564.1	130:2062144-2062244	KN270207.1	143:647152-647252			100.000	101	0	0	1	0.0125	MTA3
ss1440341256499	UNALM_VPA_Bovine777K_255	BovineHD1100008085	TTCTCAGTTAATTGCAACGGGGGAAAATAAAATCAACCTCATATTTGAAACTGATTCTCACAGGGAAAGCCCTTGCCTGGCGCTCCAGCTGCCTCTGAGCG	KB632564.1	130:286315-286415	KN269818.1	484:846376-846476			100.000	101	0	0	-1	0.0375
ss1440341256527	UNALM_VPA_Bovine777K_256	BovineHD1100008241	TTTATGGAAGTTTGAAATTAATTTTTTAAGAAGTTGAAGAAAACTAAAGTGAAACATACAGTAAGACCTATGCCAAAAATGTAGGAAGTAGAAGCCTCTGG	KB632686.1	252:1968504-1968604	KN269414.1	835:139630-139730			100.000	101	0	0	-1	0.0375	SRBD1
ss1440341256515	UNALM_VPA_Bovine777K_257	BovineHD1100009670	GACTGAGACAACTGACAGGCTGCGTATGGCTAATTGATGGACACTTGTTCTTGCTGATACTTTTGTCCACACGAAGCTGCCCTGGGAGACAGAGAACATTC	KB632559.1	125:1355276-1355376	KN268246.1	50:13862980-13863080			100.000	75	0	0	-1	0.0375	NRXN1 - NRXN1 - NRXN1 - NRXN1 - NRXN1
ss1440341256379	UNALM_VPA_Bovine777K_258	BovineHD1100012469	AAATTAGATCTTTTCTCTGCAGATGACAATTATGTATTATATGGTTACACGCTTATGAGTCTGTGACACCGTATTGTTAGACTTGGGATACTGACTTTTAA	KB632462.1	28:2444520-2444620	KN268246.1	50:6379117-6379217			100.000	101	0	0	-1	0.0375
ss1440341256410	UNALM_VPA_Bovine777K_259	BovineHD1100012745	CATCCTCCTTACAGAGAAAGGTAGTTTTGGTTGCTTAGAAACATTAGACATCTTATGGACTGCTACAGCTGAATATACTTGCATATGTAACTACTGAAATG	KB632462.1	28:3221800-3221900	KN268246.1	50:5612358-5612458			100.000	101	0	0	-1	0.0375
ss1440341256342	UNALM_VPA_Bovine777K_260	BovineHD1100016167	TAAAATTTGTTTTGTTTCTTCCTCTCCATCAATGCCTTAAAAATCCAATCTCTATGTCAGTGACAAGTATTGATACACTTTGTCAAACAAGAAATATCTTC	KB632474.1	40:2287143-2287243	KN270099.1	31:505010-505110	28		100.000	101	0	0	1	0.0375
ss1440341256237	UNALM_VPA_Bovine777K_261	BovineHD1100019456	GTATTGAAGGTGCCTCCCACTGCCCTTCTCTCCCCTAGCATCCACCTCCCATCTTCCTATGATTCAGCAACTAAACAGTTAACTCTCAGCAGGCACGTGTA	KB632437.1	3:20117028-20117128	KN270145.1	460:1602952-1603052	15		100.000	101	0	0	1	0.0375
ss1440341256315	UNALM_VPA_Bovine777K_262	BovineHD1100019853	TGGGGGTACACTGCCTTAAAGACACCAAATGTCCTATTTTCAGAAAACAGCCTGTTCGTTTCTGAAAACAGCCTGTTCGTTTCTGAGGCAGCCCTTGGCTG	KB632437.1	3:19175706-19175806	KN270145.1	460:678221-678321	15		100.000	101	0	0	1	0.0375
ss1440341256248	UNALM_VPA_Bovine777K_263	BovineHD1100021983	CCCCATGTATGAGTAGCTTTATTTCCAACTCAGAGAAATCCGGGGCTCTTGATCTTCAACTGAACTCTAGTTTTAACCTGGCTTTCATGACCTTGCATGAC	KB632437.1	3:13108103-13108203	KN269607.1	333:4275955-4276055	15		100.000	101	0	0	1	0.025
ss1440341256295	UNALM_VPA_Bovine777K_264	BovineHD1100024684	TGACCAAGCCCGGATTCTTCTCACCAGCAATTCCCTCACACTTTCTTTCATTCAGAAACCTCAGCACAAGGTGATGGCAGGTGGGGAGGGCAGCCGGGCTG	KB632437.1	3:5638267-5638367	KN267260.1	252:303284-303384	15		100.000	101	0	0	1	0.0375
ss1440341256293	UNALM_VPA_Bovine777K_265	BovineHD1100024823	TTCCTGTCTTTCCATCTACAAGTGACGCTATACTATCACTGTCAAATTAAACAACTGCCTTTTAGGGGGTAGCTGTTGACCTCACTTTGCCGGAAAAAATC	KB632437.1	3:5259259-5259359	KN268221.1	464:1412119-1412219	15		97.959	98	2	0	1	0.0375
ss1440341256231	UNALM_VPA_Bovine777K_266	BovineHD1100024859	ACTTACTCTATATCTAAAACCATGTAAGGATTAGATTGTTCTTTATCTTGTTCACTGTCATAGAAAAGGATCTTCTTACTACTCACAATCACATACTGTTA	KB632437.1	3:5058408-5058508	KN268221.1	464:1213492-1213592	15		100.000	101	0	0	1	0.0375	ROCK2
ss1440341256407	UNALM_VPA_Bovine777K_267	BovineHD1100028797	TAAGGTCTTCTGTTTCCTGACTGCAAGACACCCCCACCCTTCCATCTTTGATACATTCTGTTTTAGTTAAGTCCAATTGCTATGACGACGCAATTTCTCAA	KB632486.1	52:2354887-2354987	KN268836.1	12:12242661-12242761	4		100.000	101	0	0	-1	0.0375
ss1440341256230	UNALM_VPA_Bovine777K_268	BovineHD1100030048	CACCTTCCCTGTGCCAGGACATGGTATGCTCCCTTCCCCAGGCACCTGTCATCCCTCTGTGGACACCCAATCCCTCACCACTGAGACCAGTCCTACATTTC	KB632437.1	3:15533125-15533225	KN268597.1	594:2895558-2895658	15		100.000	101	0	0	-1	0.0375
ss1440341256501	UNALM_VPA_Bovine777K_269	BovineHD1100030927	ATTCCTGGGGCTCACCCCAAGAATCCACCTGTGCACAGGTGCACATGCAGACACAGTGCACACACAGGCACACGTGCACACTTGCACACGTTGGTGTGCCC	KB632526.1	92:6668107-6668207	KN270211.1	159:1121751-1121851	5		99.000	100	1	0	1	0.025	D2HGDH
ss1440341256564	UNALM_VPA_Bovine777K_270	BovineHD1200003029	TGCAAATATTCCTGGAAAGTTTAGAGGTGGATCATTCCTTAGCACATTAGTAGGAATCAATTTAATGAGATTGTTCTCCTCTCAACCCCGAACTGAAGCCA	KB632650.1	216:1504894-1504994	KN268962.1	76:603481-603581		14	100.000	101	0	0	-1	0.0375
ss1440341256498	UNALM_VPA_Bovine777K_271	BovineHD1200007517	ACATAAACACTCCCAGGATTTCTTCTCAGGTAAAGTAGGCCAACAGTCTGCTCGATGGTATTTTGAAAGCTAAAATTGTAAGTCACAAATACTTATTCTTT	KB632540.1	106:1007417-1007517	KN270633.1	120:2532801-2532901	14	14	100.000	101	0	0	-1	0.0375
ss1440341256538	UNALM_VPA_Bovine777K_272	BovineHD1200010447	GAAACAGCATGTGCCTTCTCACCAAGTAACGTAAACCAATAACAGGCTCCAATCATGCCATTTTTAAAAAAGCTTTAAATAACTTTCTCAATGCAAAACAA	KB632678.1	244:1352800-1352900	KN270510.1	486:1191629-1191729		14	100.000	101	0	0	-1	0.0375
ss1440341256509	UNALM_VPA_Bovine777K_273	BovineHD1200018987	TGAGTAAATAATGTCTCTTTTAACAAGTTCATAATTATGTATTTATTACATGAGCTCCTCCACAGCAGCTCCAGGGAACTGTAACAGACCCTGCTTATTCT	KB632554.1	120:2156596-2156696	KN268257.1	171:339370-339470		14	100.000	101	0	0	-1	0.0375	LOC102536271
ss1440341256489	UNALM_VPA_Bovine777K_274	BovineHD1200019007	GGGACCCCACTTCCTCCCCCTCTTCTGGGGACCTTTGTTCCTTCAGTTACACTGCTTCCCTTCAGCATTTAAACATGTGCAAATATTTGCCATTTAAAAAT	KB632554.1	120:2109169-2109269	KN268257.1	171:386509-386609		14	100.000	101	0	0	-1	0.0375	LOC102536271
ss1440341256482	UNALM_VPA_Bovine777K_275	BovineHD1200023041	TACCACAGTCACATGCTAAGCACTAGAGCAGATCATCCCCAGGATGTTTATATGATGTGTAATTTTTAAAACAGATGATGATTTAAAAGAAAATGTGCTAC	KB632518.1	84:2493045-2493145	KN268257.1	171:4271553-4271653		14	100.000	101	0	0	-1	0.0375	CLYBL
ss1440341256491	UNALM_VPA_Bovine777K_276	BovineHD1200023231	AGGTGGCAGACAGAACTCCACCCGGGGGGTTAATCAAAATTCCCTTAGAATAATTGAAAAGCATCTGCATTTTTTCCCTAGAAACCTACAAAAAAGTCACA	KB632518.1	84:1978071-1978171	KN268257.1	171:4779481-4779581		14	97.980	99	1	1	-1	0.0375	PCCA
ss1440341256494	UNALM_VPA_Bovine777K_277	BovineHD1300001079	CTAATTCAAACATCACTTTAGAAGTTAACACATTTGAGTTCCAAAAGCAATGCTTTTAACTTCTGTCCTGTGGTCAATAAGAGGCTAAGTCGATCTATAAA	KB632502.1	68:7218850-7218950	KN269971.1	266:1713706-1713806			100.000	101	0	0	1	0.0375
ss1440341256436	UNALM_VPA_Bovine777K_278	BovineHD1300001406	TACCTTATTTAAATACTACCAGTTAGGAGATTTTTAAGTTTTCTAGGAGTTACTGTCTCCTGTCAGCAAACATAAAACTTATTATTTGTTGCAATTATCCA	KB632502.1	68:8217620-8217720	KN269971.1	266:2696917-2697017			100.000	101	0	0	1	0.0375	BTBD3 - BTBD3
ss1440341256477	UNALM_VPA_Bovine777K_279	BovineHD1300006353	AGTATTCTCTTTCATTACAGGAGGACACAGATCATAATTACTATATTTCTCGGATATATGGTCCATCTGATTCTGCCAGCCGGGATTTGTGGGTGAACATA	KB632521.1	87:1667353-1667453	KN269576.1	191:886824-886924			99.010	101	1	0	1	0.0375	PLXDC2
ss1440341256614	UNALM_VPA_Bovine777K_280	BovineHD1300011583	ATTTCTCTGAGACCCTAACTCTGAATCTTCCTGTCTCTCTACTCCTCTTTTTCCCTCTCCTCCACTCCTTTCCCACCTATACAAAAATAGATTTCCCACAA	KB632774.1	340:356542-356642	KN267351.1	122:297348-297448			100.000	101	0	0	1	0.0375	CFAP61
ss1440341256555	UNALM_VPA_Bovine777K_281	BovineHD1300013436	CATAGAAAATGTTGGCAGTGAGCATAACAGGAATTTTCCAGTTAAATATCACATCATGTTTATTTTCTACTGACTGTGATTCAAATGAATAATATTGAACG	KB632651.1	217:1998212-1998312	KN268482.1	43:11189203-11189303	3		100.000	101	0	0	1	0.0375	DNAH5
ss1440341256400	UNALM_VPA_Bovine777K_282	BovineHD1300022474	CTTCCTTAAATTATTAGAGCTTTCCTACAAATCTGTGGAAGGAAATGGGAAAATCTGAATAAATAAAAAAGGCAATCTCCAAGTAAGTACAGCTGGAATGA	KB632495.1	61:8809059-8809159	KN270787.1	469:2913035-2913135	11		100.000	101	0	0	1	0.0375	PREX1 - PREX1
ss1440341256391	UNALM_VPA_Bovine777K_283	BovineHD1300022578	GGAATGGAAATAATCTAAATATTTTGTGGGTCTCATCTGACTTCTCCAGATAGAATTTACTTGTCTCGCCCTCAGTGATTCTGTACCTTTCTTTGTAGCAC	KB632495.1	61:8482189-8482289	KN270787.1	469:2586378-2586478	11		100.000	101	0	0	1	0.0375	STAU1
ss1440341256463	UNALM_VPA_Bovine777K_284	BovineHD1400002007	TTTCTTATTAATATTTATTGGCTAAGAAACAGCTCTGTCCTCACTAGACCAGAATGTGGGCTTAATTTGAAGCAGGCATGTTTGATTTGCGTTTTTGAGCG	KB632512.1	78:396737-396837	KN268010.1	297:634484-634584	25		99.010	101	1	0	-1	0.0375
ss1440341256367	UNALM_VPA_Bovine777K_285	BovineHD1400007702	AGGCTAATGCTCAGAGAAAATTCATTTTATCAACCAGCCATTTCATTCTTTGGTGCTGTTACAAGCTCCTTCCAGTTGCTAGGCAACCATAATTCATAGTA	KB632479.1	45:5072335-5072435	KN269978.1	427:2563754-2563854	29		100.000	101	0	0	-1	0.0375	TOX
ss1440341256446	UNALM_VPA_Bovine777K_286	BovineHD1400010027	TGTAGAACTATTAAAGACTTGATTTCATCCCTCCTACTTTCCACCTTTTTTTTTCTCACTCCCTTTCCTCCTTGCTCCCCATGTATTGACTGAACACTTGC	KB632547.1	113:1008872-1008972	KN267092.1	404:4949952-4950052			100.000	101	0	0	-1	0.0375	FBXW4
ss1440341256521	UNALM_VPA_Bovine777K_287	BovineHD1400014484	CAAATTAACTAGAACGTCATTAGCTGATGCTAAGAAGACAGTGCCTGGTGTTGTCTTCTGTAAATTGGCTATTTGGAGAAAATTTTTTCTAGCTATGCCTT	KB632552.1	118:2991578-2991678	KN268917.1	473:7855301-7855401			100.000	101	0	0	-1	0.05	TRPS1
ss1440341256466	UNALM_VPA_Bovine777K_288	BovineHD1400016022	TTCCTCCTCACTGAGGCAAATATAACAGGGGCCAGTCAAATCAGATTTGATGCATTGCCACAGGGCAGGGATTGCTACACCTGCCAAAATTCCCTTCTGAA	KB632567.1	133:3413177-3413277	KN267750.1	10:2819004-2819104			100.000	101	0	0	-1	0.0375	TRHR
ss1440341256255	UNALM_VPA_Bovine777K_289	BovineHD1400016592	TTTAAAGAGAAATCAATCTTTACCTTGTTGTGTTTTTAAATTTTCTTTTGAATCTACCATAAATGTTATCCATTTTTTATAATGGAAGCTTTTTTACTCTC	KB632439.1	5:3717561-3717661	KN270144.1	109:19309798-19309898			100.000	101	0	0	1	0.0375	CENPH
ss1440341256531	UNALM_VPA_Bovine777K_290	BovineHD1400017317	AACTCAGATCGCTTTACAAGTTGCCAACTCAGGATGTTTCGTGGCGCTTCATCACAGAGGAAAGATTCTTATCACATGTTCTGTTCAGTCATTGGGCCCAT	KB632682.1	248:5260-5360	KN267750.1	10:6425992-6426092			100.000	101	0	0	-1	0.0375	DPYS
ss1440341256447	UNALM_VPA_Bovine777K_291	BovineHD1400020423	AAATAGAATTATTTTCTCAAAATTCAAACATACCCAACAAGCAGCTGCTGATGACTGCAAATACTTTGCAAACCATTCTGAGGTGAAAGACACGCCCTGGA	KB632533.1	99:3465662-3465762	KN270578.1	47:2862560-2862660	25		100.000	101	0	0	-1	0.0375	TMEM67
ss1440341256510	UNALM_VPA_Bovine777K_292	BovineHD1400021222	TCCAGCCATATGGTTAAAAAGGACCTTCCACATATTGCACATTTCCTTCCCTGAGAGATTATGCTCCTGACCTGCGGGTACCATTCTATGGCTCGCATTAG	KB632533.1	99:5685113-5685213	KN270578.1	47:697707-697807	25		100.000	101	0	0	-1	0.025	LRRC69
ss1440341256326	UNALM_VPA_Bovine777K_293	BovineHD1400021924	AGAGATTTCAGAATCTTATCAGCACTCATAAACACTGATGTTTATTGTCTTGTAGCTAGAAAGGCAAGAATCACTGCAGTCAAGATATTCAAAAATCCACA	KB632467.1	33:2696469-2696569	KN266963.1	1068:553903-554003	29		100.000	101	0	0	-1	0.025	CNGB3
ss1440341256338	UNALM_VPA_Bovine777K_294	BovineHD1400022820	TTGTAACAACGGACTTTAACAGCAAACTGATTTACTCTAAGAAAATCAGGATTGTTAGGGCTTTTAATCAACAAAGAGAGAAGTATCATTCATATAGTTTT	KB632467.1	33:4416896-4416996	KN269890.1	401:4276113-4276213	29		100.000	101	0	0	-1	0.0375
ss1440341256462	UNALM_VPA_Bovine777K_295	BovineHD1400023914	TGAGTGAAACAGGCTGCTGGTAATCAAGATCTTGACAGTATAATTAATGGAATGGTATTTCTGGAGCCTCTAAATATATCAGCTCCACCATCTGCCTAAAA	KB632563.1	129:3152810-3152910	KN268917.1	473:3909555-3909655	25		100.000	101	0	0	1	0.0375	SNTB1
ss1440341256327	UNALM_VPA_Bovine777K_296	BovineHD1500002700	TGATACCAGGTGGATCATTCTAATTCCAGATTAACTACATCCCACTGACATGATTTCTTCCCCACCCTGCTGCCACCTGTCTGGTACCAAACCCGCTCAGC	KB632496.1	62:3478704-3478804	KN267482.1	397:4149594-4149694			100.000	101	0	0	-1	0.0375
ss1440341256603	UNALM_VPA_Bovine777K_297	BovineHD1500005781	GACATTGCAAGTCTTCTTGCAACTCTCCAAGAAATCAATAATGCCTCCCTTGGCAGCAGAATCCTAAGCTCAGATCACTTTGTCACATTTTAAAGCAAATG	KB632623.1	189:1449923-1450023	KN268020.1	107:4608520-4608620			100.000	101	0	0	1	0.0375
ss1440341256454	UNALM_VPA_Bovine777K_298	BovineHD1500007052	AGCTGGTTTTGCTAATTTGTTTTTACAGGGCAGTTGATAGTAAATGAATGGCATGCTGAATATTTTACTGAGATTTCAGATTATCTAAAGAATATTTCCTG	KB632508.1	74:5483995-5484095	KN269462.1	316:11939779-11939879	33		100.000	101	0	0	1	0.0375
ss1440341256565	UNALM_VPA_Bovine777K_299	BovineHD1500008274	ACAAACCAGGGCCAGGACTCTTTGTTTCTGAAGCACATGTTGAAGAAAGGTGGGGTCTTCTCTGCACAGGAGGTAGATTTCTACATTTCACAAAGGACCAA	KB632616.1	182:2199983-2200083	KN269130.1	180:1117271-1117371			99.010	101	1	0	1	0.075
ss1440341256523	UNALM_VPA_Bovine777K_300	BovineHD1500010407	TATAAGCTCTGCCCACTCTAGGGCATGACTGACTATTAAAATCTTTTTCACACCATTGCCTACAGAAAGCAGCTGGGCACCATGCCACCAGGGAGGTGGCA	KB632528.1	94:5882194-5882294	KN270215.1	183:4530052-4530152			100.000	101	0	0	1	0.0375
ss1440341256368	UNALM_VPA_Bovine777K_301	BovineHD1500011320	TATTATGCTTGTATAAAGTCATTCAGTGATGAGCAGTGGTACAGCTTCAATGATCAACATGTCAGCAGGGTAAGGAGGGTTTTTTTTTTTTTAAGATTATT	KB632472.1	38:10405943-10406043	KN270215.1	183:7336888-7336988			100.000	101	0	0	-1	0.0375	USP47
ss1440341256305	UNALM_VPA_Bovine777K_302	BovineHD1500012738	CGAATAAAAGCTGGCCTTCTGCTGACAAGGGCCCCCAAGGCGCCCTTCATATCTCTGTTCCTCAGACTGTAGATGAAGGGGTTCAGCATGGGAGTGACCAC	KB632448.1	14:17087809-17087909	KN268956.1	190:2851992-2852092	22		100.000	101	0	0	1	0.0375	LOC102527008
ss1440341256526	UNALM_VPA_Bovine777K_303	BovineHD1500022490	AGGCCCCATGTTATGGAGACATTGGACATTAGCCAGGGAATGCATAACCGTGAACTCAGTGCAGACACAACGCACGTATGCGGTTTTCTAGATTCAAACGG	KB632585.1	151:1701275-1701375	KN267867.1	138:4214269-4214369	33		100.000	101	0	0	-1	0.0375
ss1440341256598	UNALM_VPA_Bovine777K_304	BovineHD1500022836	TTTTTGATAATAATTAGAAGCAGGACATGTCATGGAAGTTCAAGTATTTCAGAAATATAATTTGAACCAGGAATTAACCTTCTATAAAGTCTTTTTGAGCG	KB632585.1	151:714094-714194	KN267867.1	138:5185858-5185958	33		100.000	101	0	0	-1	0.025	CELF1
ss1440341256607	UNALM_VPA_Bovine777K_305	BovineHD1600001097	TAGGCTTCAATACTTCAGTCTTGCAAATCATTTTAAGGTTTCTGAATGGGGCTAACAAGGGACTTTGCTATATACATCATTAAATTGTTGGCATGTGTCCT	KB632647.1	213:915755-915855	KN267131.1	689:813480-813580	23		99.010	101	1	0	1	0.0375	SRGAP2 - SRGAP2 - SRGAP2 - SRGAP2
ss1440341256429	UNALM_VPA_Bovine777K_306	BovineHD1600003850	ATTATTGTAAAGTTAAGGTCAAGAAAAAACTATAATGAAATTGTACTATAAATGATTTTAGCTTGGTCAAATTAATACAAAAATATTGAAGGGCAAGGATA	KB632552.1	118:1523423-1523523	KN270945.1	1211:109655-109755			100.000	101	0	0	1	0.0375	CSMD3 - CSMD3
ss1440341256366	UNALM_VPA_Bovine777K_307	BovineHD1600005703	ACGCATTAATTAACAGATACAAATCTACGTTCTCATGGAAGGATCAATACGGAGAAGAAAAGAGGCATCAATGTGAATTTAGTGCTGATGATGGAGAAGGC	KB632473.1	39:6232102-6232202	KN271047.1	32:6547145-6547245	23		100.000	101	0	0	1	0.0375	ESRRG
ss1440341256363	UNALM_VPA_Bovine777K_308	BovineHD1600005999	TCCACTGTTCCTGGCCTGCTCTGTGTTCATCTGGACCCCTGCTCTCTGGAAACTGAAATGAACTGAAAACTCTGGTACTAAAAACAGGTGGTAGAAGCGGA	KB632465.1	31:3669841-3669941	KN269062.1	141:5187227-5187327	20		100.000	101	0	0	1	0.0375
ss1440341256322	UNALM_VPA_Bovine777K_309	BovineHD1600006230	AAAAATTGTAGATTACATACTCCAAATTTAGAAATAAAACTGTTTCTGCTTGCAATATTATTTTCATTTTGCTCAAGCAAAGATAAACTGTATTGTTTAAA	KB632448.1	14:11385463-11385563	KN269929.1	22:2759300-2759400	22		100.000	101	0	0	-1	0.0375
ss1440341256536	UNALM_VPA_Bovine777K_310	BovineHD1600012165	CATCATCATCGTGGAAAACCTAGAGAAAGGCAAAAAGCCACAGTGAAAAACCTGTAAGATGGGGAGTCTTGATAACTGTAGCTGATAAATACAAGACTTCA	KB632752.1	318:169340-169440	KN269759.1	845:1163362-1163462			100.000	101	0	0	-1	0.0375	DIXDC1 - DIXDC1
ss1440341256270	UNALM_VPA_Bovine777K_311	BovineHD1600012248	AATAAGACCGAGCTGGACTCGTTCCTGATCGAAATCACAGCCAATATTCTCGAGTTCCAAGACACTGATGGCAAACACCTGCTGCCAAAGATCAGGGACAG	KB632436.1	2:7132401-7132501	KN270912.1	104:17008167-17008267	13		100.000	101	0	0	-1	0.0375	PGD
ss1440341256417	UNALM_VPA_Bovine777K_312	BovineHD1600012954	TGGTATAACATTTTTGGATTCAGTAAGGATGGAAAAAAATGTATATATATATTACTCTTTTGTAACATGTAAAATTCTAAATTGATAGGCTTGCTTGCTTT	KB632460.1	26:12111235-12111335	KN270149.1	376:420790-420890	26		99.010	101	1	0	-1	0.0375
ss1440341256242	UNALM_VPA_Bovine777K_313	BovineHD1600016258	CTTAAAATTTGAGACGGGGGGTGAAGGTAGGATGGGGGCTAATTTTCAAGACAAGGAGATTTCACAGTGCCGGTCTAAATATATTTCATGAGTGATTTCTT	KB632450.1	16:944828-944928	KN270072.1	134:9997528-9997628	3		100.000	101	0	0	1	0.0375
ss1440341256561	UNALM_VPA_Bovine777K_314	BovineHD1600016377	ATTACTCCCTCTTTTATACTAAGAAAAGCTCTGGAATTAGAAAATGTTTTCTTTAAAGTTTCATATTTAATCTTTATTTTCCTGAAAGATAATGAAGACTG	KB632660.1	226:1083978-1084078	KN269098.1	172:65960-66060			99.010	101	1	0	1	0.0375	CADM2
ss1440341256274	UNALM_VPA_Bovine777K_315	BovineHD1600020388	GCGAGCCTCCTTGTCAGGCCTCCAGTGGCCCTTTTCAGAGCGGGAGCAGACCTTACAAAGAGGCACTGACCTCGCCTTTCAGATGACTAGCAGCTCACCAT	KB632447.1	13:4648106-4648206	KN270886.1	128:4446908-4447008	23		99.010	101	1	0	1	0.0375
ss1440341256592	UNALM_VPA_Bovine777K_316	BovineHD1700000049	CAGAACCGAGTACACTGGGAGGTGCACCTGCTTTCTGCGTGTGGACCTAGTAAGTGGCCTGGTTCTGCCATGCCTTCCTGATCCCCAGGTACACCTGAAAT	KB632602.1	168:4017285-4017385	KN269635.1	580:33030-33130	2		100.000	101	0	0	-1	0.0375	TMEM192
ss1440341256576	UNALM_VPA_Bovine777K_317	BovineHD1700003985	ACTGGGAAAGAAAAAAATCAGCTGGATTTACTACAAAGATACATTAAGCTTCAAATGACACAAAATGATAAGGCTGTATTTAATCAGTTTTTCCCTTAAAC	KB632716.1	282:151456-151556	KN270858.1	267:4862456-4862556			100.000	101	0	0	1	0.0375
ss1440341256529	UNALM_VPA_Bovine777K_318	BovineHD1700009457	GCTCTCTTGACATTTAAAAGATACCAGAAATACCAGTGACCACATTCCATGGCTTCTTGAAGGTTTCCATGTCAGGGGGTTCAAACTCCTCTTTATTTTTA	KB632584.1	150:737133-737233	KN269726.1	149:10095871-10095971			100.000	101	0	0	1	0.0375
ss1440341256566	UNALM_VPA_Bovine777K_319	BovineHD1700009798	TGCATGGGACATGCAAATTTGTAACTGAAGACTGAATCCATGGCACCGAATCATTCATGAGAAATGATTGATATAATCTAATTTTGCACATTCTTAAAAAA	KB632737.1	303:350950-351050	KN269726.1	149:9025083-9025183			100.000	101	0	0	-1	0.025
ss1440341256445	UNALM_VPA_Bovine777K_320	BovineHD1700013724	CAAGAAAGCAGAACATCTGTTTCCATCTGGAAGGAGCCAGACTTCAAAGGCGTGACATTAAAATTGATTTATCCAATCATAAAGATAAAGCAAAATAAAAC	KB632531.1	97:2353493-2353593	KN269324.1	256:1170091-1170191	32		100.000	101	0	0	1	0.0375	TMEM132D
ss1440341256496	UNALM_VPA_Bovine777K_321	BovineHD1700014501	CCAAAGTAAACATAACTAACCTTTGAGCTACTTAGAATTCAAGCAATTACTCAGCTATTATATAGAATAGTAAGTTTGTTGCTTAATAATTAGAATGTGTA	KB632531.1	97:3649358-3649458	KN269324.1	256:2427183-2427283	32		98.039	102	0	2	1	0.0375
ss1440341256470	UNALM_VPA_Bovine777K_322	BovineHD1700014619	CGTCTCCTGCACTAATGGACCTTTCAGGATGCTAATTGCTCCATTTTTGACGTGTGTCCTTGAACCGGGTTTCTTTTTATTGTTTTAATGCCCATCGTGCA	KB632531.1	97:3839070-3839170	KN267553.1	2220:71836-71936	32		100.000	101	0	0	1	0.0375
ss1440341256486	UNALM_VPA_Bovine777K_323	BovineHD1700014903	CGCACACAGCCCTTCCTCCCACTGCCCCGACCTCAGGGCCTTTGCACTTGCTGTCCCTTTGCCTCCCCTGATGTCCTCTGCCTGATGTTGTACGAATACAT	KB632549.1	115:4110540-4110640	KN267735.1	731:5910430-5910530			100.000	100	0	0	1	0.05	SLC22A18
ss1440341256516	UNALM_VPA_Bovine777K_324	BovineHD1700020262	CATAGAAAGAGCCACAACATTTACTAAGAATCTTCTAGGTGAAATCTTACCTGGGCTCCCCCACTCTGTCCCCAGAACAACCCCACGGCGTAGATGTCATC	KB632512.1	78:3988710-3988810	KN268448.1	708:172625-172725	25		99.010	101	1	0	-1	0.0375
ss1440341256506	UNALM_VPA_Bovine777K_325	BovineHD1800001036	CATCAGGTGAATGGAAAATCCATATCAAAGAGCATGTTCTACTTTTATGTCGGTAAACCTGAAGTTGTTTCCTGAGTAATGAGAGAAGGGGAAGCTAAATT	KB632504.1	70:1371624-1371724	KN270341.1	63:1360381-1360481		9	99.010	101	1	0	1	0.0375	CNTNAP4
ss1440341256431	UNALM_VPA_Bovine777K_326	BovineHD1800006101	ACGTGCGAAGCTATTCCCGGGAGCTTCCCATGGCGCACGCGGCGCGTACCGGGAAGAAGGGTTTGCGGGATCGCCAGCTCGGCTCCGTTCCCGGCAGCACG	KB632509.1	75:3563025-3563125	KN269540.1	175:1433029-1433129		9	100.000	101	0	0	1	0.0375	LOC107033870
ss1440341256441	UNALM_VPA_Bovine777K_327	BovineHD1800006926	CTGTTTCTGCGACTAACGTTGAGGAATTAAAATTGCTTTTACCCACATAAATGTCTCTGCTACTGGGTTCAGTGGTCATGAAGGATGACAACTCGATAAAC	KB632509.1	75:1237417-1237517	KN268021.1	868:864954-865054		9	100.000	101	0	0	-1	0.0375	FTO
ss1440341256520	UNALM_VPA_Bovine777K_328	BovineHD1800006946	TCAGAGACTGAGCGCGTCAGTGGGGACAGTTTAATTACCGCCTTTGACGCTCCTTCCCTGAATACCAATCTTTCCTGAGTTACATGATGAACACACATTAG	KB632509.1	75:1170293-1170393	KN268021.1	868:931749-931849		9	100.000	101	0	0	-1	0.0375
ss1440341256426	UNALM_VPA_Bovine777K_329	BovineHD1800007163	CAGCTGAGACTTCTTAAATCCACATTGAAACAACTGTTGGGTTTTTATACCGTTGTAAAACTCTTTGTAGGGTATTCATAGAAAATGTTTTATTAATTGCC	KB632509.1	75:519686-519786	KN268021.1	868:1577538-1577638		9	100.000	101	0	0	-1	0.0375
ss1440341256619	UNALM_VPA_Bovine777K_330	BovineHD1800008487	GAAGTTGCTTTGCAAAGAGAAAAGTATGAGTTAGGGGCCAATAAATTGTGTGTTTTCCCAACTCAGTTCCTCTGCCTCTGCACTAGGAATTTCCCCTGATA	KB632629.1	195:474839-474939	KN269701.1	670:493355-493455	9	9	100.000	101	0	0	1	0.0375
ss1440341256432	UNALM_VPA_Bovine777K_331	BovineHD1800008801	AATCAAGAGACAAGGTGTCATTTGTATTTATATGCAAGTAGAACTGGAAATGCTGATCATGAAACATTCAGCAACATTATTTCTCTCTCTTTCTCTTTTTA	KB632556.1	122:4538743-4538843	KN266896.1	210:205274-205374		9	99.010	101	1	0	-1	0.0375
ss1440341256428	UNALM_VPA_Bovine777K_332	BovineHD1800010992	GCTATAGCTAATATTTTATAAGGCTGCTTACATCAGTCCTGAATTTCGTCTTTAATGAGAGTAATTTCTAGTAACGACAGGCTTCTCAAAACATCTTGCTT	KB632505.1	71:996380-996480	KN268270.1	27:6464997-6465097		9	99.010	101	1	0	-1	0.0375	NPAS3
ss1440341256388	UNALM_VPA_Bovine777K_333	BovineHD1800011170	GAGCTGAAAGAGAAACTCAGTTTTAAAAATCCTGTCCAGTGCTTCTGTTCATGTTCAGCCCACAGATCAGAGGCTGCAAAGGGTGATTCACACAAGGGAGG	KB632473.1	39:11133633-11133733	KN269555.1	110:3756325-3756425	23	9	100.000	101	0	0	1	0.0375
ss1440341256543	UNALM_VPA_Bovine777K_334	BovineHD1800012087	GCCTTAGCCCTGGCTCCACATGGGCGTGAACTTCTTAAGGCTAAATCTTGCGGTCTCCTTAATGAAATCCCTGTGGCGGCCGCTTCTACCCTTCCTTTGAA	KB632583.1	149:2812222-2812322	KN269807.1	300:4537447-4537547		9	100.000	101	0	0	1	0.0375	ZNF536 - ZNF536
ss1440341256589	UNALM_VPA_Bovine777K_335	BovineHD1800012530	ATGCAAATTAGAAAAACAAGCAGGCAATAAATTCTTTCACATCTGTAGTCCTTGCATGAATTTGTAATAATTTTTAATAAAGCATGATTGTAGTTTGTAGC	KB632583.1	149:1705239-1705339	KN269807.1	300:3440682-3440782		9	100.000	101	0	0	1	0.0375
ss1440341256547	UNALM_VPA_Bovine777K_336	BovineHD1900001747	CACTTTCCAGAGCCTGTTCTGTTTATGTGTTTTCCCCACTTTGCAGTTAGCTGGTCAGTCAAAACAGTCCTTCCCAGAATTATGGACAGGGTGAGCCCTCC	KB632685.1	251:1978387-1978487	KN267454.1	1121:1204309-1204409	16	16	100.000	101	0	0	1	0.0375
ss1440341256288	UNALM_VPA_Bovine777K_337	BovineHD1900002772	GACACTGTCTGCACCGGCAAAATTACTTTGTTTACAAGTTTTGGTAACCACCAGAAGCTTGTTAATGATACACAAACAGAAGTCATTAAAATTTTTCACTG	KB632435.1	1:9798114-9798214	KN268598.1	84:5145135-5145235	17	16	100.000	101	0	0	1	0.0375	FHIT
ss1440341256478	UNALM_VPA_Bovine777K_338	BovineHD1900004133	AGGAAATTAAGTGCGGATTAGAGTAATTAAATGTAAAGTCTCCTTGAGAGCAACTTCTGTTCCTGAAGACTGGAGCCATTTCTGTGAAATCACAGAAAAAT	KB632579.1	145:4568804-4568904	KN267916.1	115:3042933-3043033	16	16	100.000	101	0	0	1	0.0375
ss1440341256461	UNALM_VPA_Bovine777K_339	BovineHD1900005279	ATCAGTAAAATGGTACACGGGGAGGTATTTCACCCAGATGTCTGCAGATATAGGCTGACACCTCCCAGGCAGTGGAATAAAGAATGTGCAAGTGGGAAAAG	KB632579.1	145:2116499-2116599	KN267916.1	115:626109-626209	16	16	100.000	101	0	0	1	0.0375	TEFM
ss1440341256312	UNALM_VPA_Bovine777K_340	BovineHD1900010545	AAGTCTGTTATTATTCAACAACATGATATGAGTAAAGACAGAAAAATATAGATGCTCAGTTTGAAAGACTAGGTTTGTGTCATCCTGCTTCATATGATTGC	KB632435.1	1:23131730-23131830	KN267151.1	320:6768342-6768442	17	16	100.000	101	0	0	1	0.0375	CNTN4 - CNTN4
ss1440341256314	UNALM_VPA_Bovine777K_341	BovineHD1900013512	CGTCCTGGGACAGAGAATGTGCGTTCTTCAGAGGCTCAGAACTCCCAGTCATCCACCTCCAGCTCTTCCAGGTTTGTTACCAGGCCAAAGATTCCACTTTG	KB632449.1	15:2976929-2977029	KN270580.1	311:201204-201304	16	16	100.000	98	0	0	-1	0.05	STRADA - STRADA
ss1440341256292	UNALM_VPA_Bovine777K_342	BovineHD1900017794	GATTCATTGCCTAAAATGTTTTGCTAGTTTTGTTTTTACCTGCTTGGTCAATTTCTGCTTCAACTTCCAGCTTTAAGAATACATCTTCCAAAGTCGTCATG	KB632449.1	15:6610968-6611068	KN268498.1	4:3361890-3361990	16	16	100.000	101	0	0	1	0.0375	ABCA5
ss1440341256290	UNALM_VPA_Bovine777K_343	BovineHD2000002205	GCCAGAATAAAGGTCAAGGTCACTTTAGCAGTCCCTCAAATCCCGCTGGCATGAGCTCTCTTCCTGTCTGCTTTGTCTGCAAGATTCGGTGCCAAGGGTTC	KB632445.1	11:6859460-6859560	KN270008.1	30:8460218-8460318		3	99.010	101	1	0	1	0.0375
ss1440341256507	UNALM_VPA_Bovine777K_344	BovineHD2000005723	TCCTCACTTCCCTTCTTTCTCTCCAAGTTTTTAATTCTTTCTTTTTCTAATTACCAATAATCAGACATTGGCCATTCTTACATATTAATTCTTCTCTGAAA	KB632528.1	94:2837557-2837657	KN270215.1	183:1498254-1498354		3	100.000	101	0	0	1	0.0375
ss1440341256376	UNALM_VPA_Bovine777K_345	BovineHD2000006716	GGGGGATCGGTGGCTCATTTGCTCAGTAAATATGGAGCTTTCAAGGAATCAGTAGTTATTAACTATACTGAACAATTACTTCGTGGCCTTTCATATCTCCA	KB632491.1	57:3583391-3583491	KN270144.1	109:9878032-9878132		3	100.000	101	0	0	1	0.0375	MAP3K1
ss1440341256588	UNALM_VPA_Bovine777K_346	BovineHD2000008054	ATCCATTTGAGCAGGCCCCAGGATAATGCAGAGCAGATGGGCAGAGTTTTGTCTAATTAGATTCTGGGCGGCCTGTTTGCTGGAGTAAATGTGCATGTATT	KB632861.1	427:182132-182232	KN270144.1	109:6132484-6132584		3	100.000	101	0	0	-1	0.05
ss1440341256300	UNALM_VPA_Bovine777K_347	BovineHD2000012901	AGGTCCTGTTTTCCAGGGTAAGGTGAGCTAGCTAAAGCTGAGTTGGAAGATTGTGATTGGTGTGTGTTAGGATTCCTCAACAGTGAGGCATTTCCTGCACA	KB632443.1	9:7537556-7537656	KN267800.1	245:1288131-1288231	2	3	99.010	101	1	0	-1	0.0375
ss1440341256600	UNALM_VPA_Bovine777K_348	BovineHD2000016428	TGGACATCTGGAATAAGTCACTTTGAGAAAGCCAGTTAAAAGTAATTACTTCAAATTCCTTTATTACATCCTGGACCAAATACCCCAACCATTTTCACCTT	KB632590.1	156:209428-209528	KN268788.1	298:2503496-2503596	X/Y	3	100.000	101	0	0	1	0.0375
ss1440341256422	UNALM_VPA_Bovine777K_349	BovineHD2000018872	CTTCTCTTTATTTACAAGTGAGAGAAGTTACATGAGTAATAGAATGCATATAATGTACAGAGGTTTAAACCATGCTATGAACCCCATCCAAGGGTTCCTAA	KB632463.1	29:11781518-11781618	KN270091.1	283:2752003-2752103		3	100.000	101	0	0	-1	0.0375	SEMA6D - SEMA6D
ss1440341256439	UNALM_VPA_Bovine777K_350	BovineHD2000021170	TCCCTTAAGTTTTTTGGGAAAAAAAAACTGTTAATTTTGGAGTCTTCTCTTGCCAGCAACTAGCAAGTCTGTACAATTCAGTTGCCAAGGCAATATCAAGA	KB632507.1	73:89585-89685	KN268227.1	537:3010733-3010833	3	3	100.000	101	0	0	-1	0.05	SLC1A3 - SLC1A3 - SLC1A3
ss1440341256495	UNALM_VPA_Bovine777K_351	BovineHD2100002543	GCAGTAACAAGCATTCTTCTGTTCAAATTTATATCAATTAGTTTAGGACAGTAATTCAATTGGATGGCCCACTGGATTTTGAAAGACTCGCGACCATGTCA	KB632565.1	131:3733692-3733792	KN270008.1	30:11820069-11820169	27		100.000	101	0	0	-1	0.0375
ss1440341256577	UNALM_VPA_Bovine777K_352	BovineHD2100004828	GATCTGGTAAGCAGGAATGGCACTGGGTTTATCTTGAATGAATGAATGAATCCTGGCTCTGTGGAGTTGTGGTCTGGCCTTTGACTGATTCCTTTGGCTGT	KB632686.1	252:1037567-1037667	KN269414.1	835:1072392-1072492			100.000	101	0	0	-1	0.025
ss1440341256251	UNALM_VPA_Bovine777K_353	BovineHD2100005037	GAATTAACTGAAAAGGTCACCCAAAAATGTGACTTTTCTCCCCAAGGAACAGTGATATCAAAAGCTAATGAAATCTGAACTTTATCATTTCCCACTGAACT	KB632445.1	11:5208216-5208316	KN270008.1	30:6838035-6838135			100.000	101	0	0	1	0.0375	LOC107032903
ss1440341256522	UNALM_VPA_Bovine777K_354	BovineHD2100010811	CTAATTATTATCTAAACAGGAACATTTATAATATCTAACTAGAAAAATGAGGTAAACAAAATGTAAGTACAGTACATTGCCTCAATTTTATATGATGAAAT	KB632505.1	71:6831414-6831514	KN268270.1	27:639156-639256			100.000	101	0	0	-1	0.0375
ss1440341256519	UNALM_VPA_Bovine777K_355	BovineHD2100011088	AAGGCTTTCAGATAAGGCTTTGGGAATTATTTGCATGACTGTGATAATAAAAATAACTTAGTTGAATGATATTCCATAGGGGAAAGTGGAAAGGACACAGG	KB632505.1	71:5873814-5873914	KN268270.1	27:1596761-1596861			100.000	101	0	0	-1	0.0375
ss1440341256513	UNALM_VPA_Bovine777K_356	BovineHD2100012772	TTGTCAAATTCACTTTTTGAATAAATGGAAAGACTAACACCTATCATTTCTTAGATAATGTTTTACTATCCTGCATTGAATAAAACTTTTTTAAACCAGGT	KB632505.1	71:1061401-1061501	KN268270.1	27:6399925-6400025			100.000	101	0	0	-1	0.0375	NPAS3
ss1440341256416	UNALM_VPA_Bovine777K_357	BovineHD2100019991	GCAGAGGGTACACCTGGCTGCTGGGAGCTTTGACCTCACAGGGAAAGTCTACAGAATTACCTGCCTTAGGAATCCTTTATCCTATTGGAGAGGATTTCATC	KB632461.1	27:9384872-9384972	KN267249.1	97:3533732-3533832	18		99.010	101	1	0	-1	0.0375
ss1440341256275	UNALM_VPA_Bovine777K_358	BovineHD2200007128	TAATTACAGCTCTCCTTTAAAACCTCCACTCTTCCAGCAAGGATCCAGTTAGCTTTCATCTTATCTCTAATCTCTTATTTCAAAGGTGGATTAAAAGGTAA	KB632435.1	1:23326340-23326440	KN267151.1	320:6954106-6954206	17	17	100.000	101	0	0	1	0.0375	CNTN4 - CNTN4
ss1440341256306	UNALM_VPA_Bovine777K_359	BovineHD2200009492	TAGTCACCTCGGTTGTGCAATAATCTTGAAAATGGAAGTCACACGTGATGAATGAATTCCTAATTCCAAGCCCTGAGCTGTTTACCTTGTAAGTTATTTTC	KB632435.1	1:16005946-16006046	KN269669.1	572:4045490-4045590	17	17	100.000	101	0	0	1	0.0375	FAM19A1
ss1440341256313	UNALM_VPA_Bovine777K_360	BovineHD2200013466	GTCTGACTACCACAGTGTGGTCACCCCAGCTACCACTCACAAAGGCTGGGAGCTTTTAAAATGCTGTGTAAAACTGAAATTGAAATCTAGAGTTTTGTACC	KB632435.1	1:4750586-4750686	KN268598.1	84:158671-158771	17	17	100.000	101	0	0	1	0.0375	CACNA2D3
ss1440341256265	UNALM_VPA_Bovine777K_361	BovineHD2300000191	TAAAAAAACAGATTAAGTGAGTTGATGCGGGGCTTACGTCTGCTGCAGCACACAGTGGGGGTCAGGTGGGTTTCCCCAGCCTTTTTCTTAAACATCTAGTT	KB632449.1	15:14822358-14822458	KN268498.1	4:11444193-11444293	16	20	99.010	101	1	0	1	0.0375	RPTOR
ss1440341256550	UNALM_VPA_Bovine777K_362	BovineHD2300000608	TTCCATTCTTCCTGCTGCCTTACTATCCTGAGCAGAGATGGCAAAAATAATTTCAAAACTGGAATTATTCATTGCTAAACCTTTAATCAAATTAGTATTTG	KB632705.1	271:76889-76989	KN269552.1	165:1297033-1297133	10	20	100.000	101	0	0	-1	0.0375	LOC102541689
ss1440341256372	UNALM_VPA_Bovine777K_363	BovineHD2300002121	ATATATTTTGTTCTTCTCGCCTTAACAAAACCTCAGACACACTTTCCCACACTCATGCACGGTGGCGGTGGGTGGGTGGGAAGACAGCTGAATTCATCAAG	KB632465.1	31:11264402-11264502	KN268391.1	610:1958031-1958131	20	20	100.000	101	0	0	1	0.025	PACSIN1 - PACSIN1 - PACSIN1
ss1440341256411	UNALM_VPA_Bovine777K_364	BovineHD2300003359	GTCTGACTTGAATCAGAAAAGGCTCAGGCAATGACTTCTGCAAAATGACCCTAAAAAGTCTGCCCTCCTTAGAGACACGTAGGAAAGGCTGAATCCTCAGC	KB632465.1	31:7468654-7468754	KN269062.1	141:8965211-8965311	20	20	100.000	101	0	0	1	0.025
ss1440341256514	UNALM_VPA_Bovine777K_365	BovineHD2300006208	AACACATATACATGTTTCATCATTCAAATGCTAATGAATCTATAAACCTCATTATTTCTTATCTATCTTTGAGTTTCCACAGCAGTTTTTGGTGACATACC	KB632566.1	132:4696932-4697032	KN269062.1	141:1150932-1151032		20	100.000	101	0	0	1	0.05
ss1440341256559	UNALM_VPA_Bovine777K_366	BovineHD2300007487	TTGTGGTCAATGTACTCCAGGATGACTCGGGCTATCTGCACCAGGGTCAGGATGAGGGCTCCGAAGGCTAGTGACCCGGTGTGGTAACTGCACAGGACTTA	KB632644.1	210:2515779-2515879	KN270427.1	787:272071-272171	20	20	100.000	101	0	0	1	0.0375	SLC44A4
ss1440341256488	UNALM_VPA_Bovine777K_367	BovineHD2300010555	TCACATACAATTAAACCGAAAGGCTGACAGTGTAATTTCACAAATGATAGAGGATATTAGAAACTAGGGCCACTCAGATTTCTAAACCCTGGAATCAAGCT	KB632527.1	93:3943786-3943886	KN270154.1	95:2742514-2742614		20	100.000	101	0	0	-1	0.0375
ss1440341256319	UNALM_VPA_Bovine777K_368	BovineHD2300010595	CTTTAAGTATATCCATTTCTTTAGAAGGAAGTCATTGGCTAAGAACTCCAATATCAAATTTAGAAACAATGATTCCAACACACATTACATCAAACGTGTTA	KB632443.1	9:18183517-18183617	KN269544.1	223:4283412-4283512	2	20	100.000	101	0	0	-1	0.0375	USO1
ss1440341256232	UNALM_VPA_Bovine777K_369	BovineHD2300011286	CCAACATACCAACTCTTTTCAGGTGAAATTATCTAGGTTATAAAAACAAGCAACAACTGTGTTTTCATTATTCCTTAATTTGTGGCTGACAGAAATAGCTT	KB632446.1	12:5329934-5330034	KN269097.1	281:3096104-3096204		20	100.000	101	0	0	1	0.0375	RNF144B
ss1440341256252	UNALM_VPA_Bovine777K_370	BovineHD2300013291	AGTACATAAATATGTAAATTTCATTTGTACAAACTTGGATGAAATTGGGCAGTAAATTATAAATTCAAAATCTAGAAGATGCCTATAAAGATTAAGGTAAT	KB632446.1	12:11287118-11287218	KN270275.1	334:2750461-2750561		20	100.000	101	0	0	-1	0.0375
ss1440341256533	UNALM_VPA_Bovine777K_371	BovineHD2400000801	CATTTCTAACAAAGCACATATTCAGGTCTCGGATCTCATTGGTTCATCTCTCTCTGTCCTAACCATCCTTCGCATCCCAGACTGGATGCCAAAGAAAGAAA	KB632603.1	169:2139983-2140083	KN269616.1	150:1872297-1872397			99.010	101	0	1	-1	0.0375
ss1440341256396	UNALM_VPA_Bovine777K_372	BovineHD2400007634	ACAGACAATAAAAAGCATATGGAAAGAGTTTTGTGGGTAAACAAAACAGAGATATTTTTATCCTGAGTATCTTGAGGTGATTCTTGGGTTCTTCTGAGACT	KB632483.1	49:1289174-1289274	KN270260.1	410:1326520-1326620			100.000	101	0	0	1	0.0375
ss1440341256605	UNALM_VPA_Bovine777K_373	BovineHD2400011482	GGTTAATCCACACATGGCCAACAACTGCTTTCCAACCCACGTCCTATCTCCTTGTCTCTAAATGAAGGTTTACAACAAGAGAATATAAAAGGTGCCAGGTA	KB632610.1	176:2651554-2651654	KN269630.1	118:1183143-1183243	24		100.000	101	0	0	-1	0.05	PTPRM - PTPRM - PTPRM - PTPRM
ss1440341256406	UNALM_VPA_Bovine777K_374	BovineHD2400015592	CACCAGGAATAAGACGAGCTTGTTTCCACGGCTGGCTGTCAAATGATATGCGTGTTGACAAAGGAAATTTGCTGGTTTTGTCAAAGGCTGGGGGTTAGTGG	KB632488.1	54:6191638-6191738	KN270664.1	144:1677034-1677134	30		100.000	101	0	0	-1	0.0375	RAB27B
ss1440341256414	UNALM_VPA_Bovine777K_375	BovineHD2400015838	GGTCACGAGCCCAGCGTAGTTGGCAGTAAAATGGATTGTTTGGAATGTGTCCCTAAAATCCTGTAATTTAATTTTCATTATTTATGTAACACAGTATACGT	KB632488.1	54:5570476-5570576	KN270664.1	144:2285810-2285910	30		100.000	101	0	0	-1	0.025	TCF4 - TCF4
ss1440341256525	UNALM_VPA_Bovine777K_376	BovineHD2400016082	TAAACATTTGATGACCTCCTTTACAGTTATTTGAAATTTCAAAATAAATATTTTGACTTTAGAATTAAAGGATCCTCGTGTTGGTGTTTGCCATGCTAAGC	KB632508.1	74:1584564-1584664	KN269462.1	316:8093168-8093268	33		100.000	101	0	0	1	0.0375	ARHGEF12
ss1440341256490	UNALM_VPA_Bovine777K_377	BovineHD2500004741	CATTAATACGGACCAGTGCTCCCTAGAAACTTGACTCTGACAGGGCAATGTTACTGTTGGAGTCTTTCTATTGTAAGAGAAATAGGAAAAACTCCAGGGGA	KB632581.1	147:2761800-2761900	KN267895.1	67:1174217-1174317		18	100.000	101	0	0	-1	0.0375
ss1440341256283	UNALM_VPA_Bovine777K_378	BovineHD2500008598	TCTTTGTGCATACTTTACTAGCCTTCCAACACAGATCTCTGACCCTAGCACAAAATGAGCACACACTCTTCTGGGGTCTACGAGCATTGCCAAAAGCTACT	KB632455.1	21:8811813-8811913	KN269972.1	467:1381219-1381319	8	18	100.000	101	0	0	-1	0.0375
ss1440341256329	UNALM_VPA_Bovine777K_379	BovineHD2600001113	GGTAAGATTAAACTTCCTGAAATGGACTAATACATTAGAGAAAAGAAATATATAAAACAAATAACTTAGTGTTTCTTACCATTTAAATAGCATAACATTTA	KB632495.1	61:87238-87338	KN267567.1	195:573086-573186	11	11	100.000	101	0	0	-1	0.05	PCDH15 - PCDH15 - PCDH15
ss1440341256253	UNALM_VPA_Bovine777K_380	BovineHD2600007302	TCTCTCTTCAGATAAGATTTGCTTTGTCCACCCCTGCTCCTCCCCATCCACAAAGAGGCCAAGCACAGAGTCATAGCACTAGGAAACTTCACCATTTTGAC	KB632454.1	20:12768078-12768178	KN268757.1	809:1396927-1397027	11	11	100.000	101	0	0	1	0.05
ss1440341256307	UNALM_VPA_Bovine777K_381	BovineHD2600007563	AAAATAAGATTGTGTGGGAAATTCTAGCCATTTCATGTCACAGTTTCAGTAAAACTAGACTGTTTGCATTTGTCACTTTTACTGAAAGAGTGTCTTTATAA	KB632454.1	20:12109021-12109121	KN268757.1	809:755387-755487	11	11	100.000	101	0	0	1	0.0375	SORCS1
ss1440341256341	UNALM_VPA_Bovine777K_382	BovineHD2600007994	TTTGGATGTCAGTGGCAATAGGAGTGTCATAAAACTTGATTTTAAGTCACTTTAGAAAGTACAAAAACCCTGAGAATTAAAAAAAGAGATATTTGAGTTAC	KB632493.1	59:7127173-7127273	KN269104.1	247:3595660-3595760		11	100.000	101	0	0	1	0.0375
ss1440341256492	UNALM_VPA_Bovine777K_383	BovineHD2600009063	GTAGTTGGTTGATGGTTTAAAACTCAAGGAAATTCAGAGACATTAGCACATAATACAAGTCTTTTTTTTTTTAAATAAAAGATTGTGTATCAATGAAGTGA	KB632556.1	122:3095625-3095725	KN266896.1	210:1626756-1626856		11	98.020	101	0	1	-1	0.025
ss1440341256567	UNALM_VPA_Bovine777K_384	BovineHD2600010326	CACTCGGATCCCCATGTTGCTAAGTCACATCCATTATACTGCTTTATAGTCACATTTGTATTTTTTATTATTAATGCTATCAATACAATATTTATTCACTG	KB632617.1	183:1697789-1697889	KN269367.1	45:969349-969449	6	11	100.000	101	0	0	1	0.025
ss1440341256285	UNALM_VPA_Bovine777K_385	BovineHD2600010622	GTTTTCTAAGTCCACGAGTGACAGGATTATTGTGTAAGTGCTTCCGAAATGCTTTCATCTTGACTGTTCTCCTCTGAAGCTGTTGGAAGGGGCTTTGCCAA	KB632454.1	20:3476474-3476574	KN267040.1	277:3274314-3274414	11	11	100.000	101	0	0	1	0.0375
ss1440341256356	UNALM_VPA_Bovine777K_386	BovineHD2700006524	GATTTCATTTGTGAAAAATCTGTCAAGAAAATTCCATGTATCTTATGAAGGACTCAACCTTCAGAACTGAGAGCATGCATTCATAAGGTTTTATAAATATT	KB632460.1	26:11422362-11422462	KN270149.1	376:1102169-1102269	26	26	100.000	101	0	0	-1	0.0375
ss1440341256229	UNALM_VPA_Bovine777K_387	BovineHD2700008584	AAATGGAGATCTTGGAGCGGGAAGCTTTTTCTTACAGAGCTGATAGGGACTGACAGCACCTTTGAAGGTCTCTGTACAGACATCAGAGGGGCTGGAGATGG	KB632438.1	4:221512-221612	KN271016.1	160:2644382-2644482		26	100.000	101	0	0	-1	0.0375
ss1440341256572	UNALM_VPA_Bovine777K_388	BovineHD2700012037	TTTTTGCTGGGGACATTTTATTGCAAAAGAGCTCTACTTTTTGTTCTGCAAAGGGAGGTACCAATGATAAAACTGGCTATTAGTGGAAGAGGTGTTTTGAG	KB632761.1	327:623713-623813	KN271044.1	193:3380582-3380682		26	100.000	101	0	0	1	0.025
ss1440341256244	UNALM_VPA_Bovine777K_389	BovineHD2800000662	AGCACAGCACAGATGGCTGTGAGCCTGGCATCCAGCAGAGAGCCTCCACATGTGTATGCGTATGTGTGTGCACACACCTGTGTGTCTATGGGGGCTGTTTT	KB632435.1	1:243752-243852	KN267575.1	560:183950-184050	17	11	100.000	101	0	0	1	0.0375	PFKFB4
ss1440341256471	UNALM_VPA_Bovine777K_390	BovineHD2800008493	ATATTCGGCAATCTTCACTCTGGATATGTGGGACTGACCTTGTGTTAAGACTAAATCATTTCATCCCAGACAAAGTCTGTTTGGAGTTAATTGGAGAAGCA	KB632569.1	135:1476701-1476801	KN268387.1	1:6995611-6995711		11	100.000	101	0	0	-1	0.0375	LOC102541495
ss1440341256609	UNALM_VPA_Bovine777K_391	BovineHD2800010233	AATTAGCTCTGAGTCTGGCTGATTATGGCAAAGGTGTAATGATTTTAAGGGCATGTTACAAAGAAAAATGCTGACATTGTGATTCAAACTCATATCAAGCT	KB632599.1	165:2187689-2187789	KN268387.1	1:2920155-2920255		11	99.010	101	1	0	1	0.0375	NRG3 - NRG3
ss1440341256443	UNALM_VPA_Bovine777K_392	BovineHD2800010415	CTCCCAGTCATCAGTTACTATGTCAGCCACTGAAAAACAACAACAATGTATTATTGGCCTTTATAGGATGGATCTTAAACAACAGCCTTCTTTTTGGACTG	KB632580.1	146:825744-825844	KN269726.1	149:1508201-1508301		11	100.000	101	0	0	-1	0.0375
ss1440341256541	UNALM_VPA_Bovine777K_393	BovineHD2800010785	ATCAAAACAAACAAAGTGAGATCCAGACAAAGACAGGGCTTTCCTTGTAATAAAATGCCTGTAAGATTCTGTAGTAGAAACCTCAGAAGTTAGTGGCACTG	KB632599.1	165:1050006-1050106	KN268387.1	1:1800418-1800518		11	100.000	101	0	0	1	0.0375
ss1440341256460	UNALM_VPA_Bovine777K_394	BovineHD2800013767	ATGATAATAACTGCTTTGTCAAGAGTTACCACTTAATTCCACAGTGAAACGTCACATCACGCGTACAATGTGCTTTTAAGATAGAGATTAAATAATAAAAT	KB632569.1	135:80304-80404	KN268077.1	58:1275082-1275182		11	100.000	101	0	0	-1	0.0375	LOC102537158
ss1440341256281	UNALM_VPA_Bovine777K_395	BovineHD2900004079	AAACTGCTGCTATTCAATAGATAAAGCTTCTCAAGTCTAACCTGTTTTACATTAAATTTGTGGCCTAATTTTCGTTTCTCTCTGAGTTCTCAATTTCTCAG	KB632438.1	4:21147824-21147924	KN269056.1	157:2609530-2609630			99.010	101	1	0	1	0.025
ss1440341256430	UNALM_VPA_Bovine777K_396	BovineHD2900006346	GAAGAGATGCTGAGATGTTAGAAAAAGGACTCATTTATCTCTCTGAAGTTATGCTTCTAAGCCAGGATCACACACACCTTAGGGGGCGGGAAAGCATCAAT	KB632528.1	94:99315-99415	KN269552.1	165:10129429-10129529			100.000	101	0	0	1	0.0375
ss1440341256579	UNALM_VPA_Bovine777K_397	BovineHD2900006588	GAGGGCAGGGCTATAAGGCCGACTTGAACTCACCTTGTCGCCACGGTGAATTCAAAGATAATGAAAGGATAATGACTGACTGACTTGAGGGCCAGGGCGCT	KB632611.1	177:2024100-2024200	KN267967.1	388:2997839-2997939			100.000	101	0	0	1	0.0375
ss1440341256434	UNALM_VPA_Bovine777K_398	BovineHD2900008313	GTTTGACCCCAGGTCAGGAAACCAAAAATGAATCGTGAAATTCATCAAGTACCTGAAATTCCATGTTGCAGAGAATTTTGAGGAAGTTCTATCAAAATGCC	KB632535.1	101:2935309-2935409	KN269462.1	316:5321592-5321692			100.000	101	0	0	-1	0.0375
ss1440341256451	UNALM_VPA_Bovine777K_399	BovineHD3000000933	TGAGTGCCTATCTAATCTGTTTGAGGACTGGAGTTAAACTTGGATCAGAAATTTTTACTCTACGAACATATCAATTGCTAGAATTTGCACATTTTTCTTTG	KB632520.1	86:5273246-5273346	KN271048.1	55:10110620-10110720		X	100.000	101	0	0	1	0.0375	DOCK11
ss1440341256518	UNALM_VPA_Bovine777K_400	BovineHD3000001040	TTGCGCACATACTTACCAGTAGTAGAGAGTATAGTTAGTGTCAGGACTTGTATTCCTTCCAGGGAGCCAAGTACAGGTCATGTAGCTCAGGTTATGCCAAA	KB632520.1	86:5177959-5178059	KN271048.1	55:10016065-10016165		X	100.000	101	0	0	1	0.0375	IL13RA1
ss1440341256601	UNALM_VPA_Bovine777K_401	BovineHD3000002285	CGCTCGGTAGATGACAGCTCTTTGCTATCAGTGTTCCTGTGCAGAAAGGAATTGGCACTCAGTGTTCTACTTTCCTTAGACACTCATATGCATAGAGGCAG	KB632590.1	156:2632846-2632946	KN268788.1	298:4907922-4908022	X/Y	X	100.000	101	0	0	1	0.0375	RAB9A
ss1440341256384	UNALM_VPA_Bovine777K_402	BovineHD3000003002	GAGTATTATTCTAATGCAATTTTTGAAGGATGTTGATCAACATTTGCTTTCATTTCTCTGAAAGTGTTACTCAAACATGTATATTAAAGGCAATAATGTTT	KB632475.1	41:7331055-7331155	KN271048.1	55:5950224-5950324		X	99.010	101	1	0	-1	0.0375	TENM1 - TENM1
ss1440341256425	UNALM_VPA_Bovine777K_403	BovineHD3000003881	GTCCCAGTTTCCTCTGTGTGTACTCAAGCACAGATATTTCTTTCTTATGTTTTTCCTGATATACCTTATGCTGAACCAAAGCAACCAGAAAATTGATTGGA	KB632475.1	41:9346851-9346951	KN271048.1	55:3945835-3945935		X	99.010	101	1	0	-1	0.0375
ss1440341256317	UNALM_VPA_Bovine777K_404	BovineHD3000007366	CAATTACACCTGCCCCTGTATTTATTTTTCTGTATTTCTGTTCTACAGTTTCCATCAGTTCTTATCTTTTTCTTGAGATTTCAACCTCTCTCTTTCTTGAT	KB632438.1	4:19516559-19516659	KN269056.1	157:1005391-1005491		X	100.000	101	0	0	1	0.0375	DLG2
ss1440341256582	UNALM_VPA_Bovine777K_405	BovineHD3000013168	TTGAAATTGATGATACGTTTACAGCTACTTCGTTTAGTTGCTGAGTAATGACACTATCCTTTCTAGGTTATTTGCTTGCTTAAGCAAGAAACTAACCAATT	KB632626.1	192:2830955-2831055	KN270575.1	71:503628-503728		X	100.000	101	0	0	-1	0.0375	PCDH11X
ss1440341256508	UNALM_VPA_Bovine777K_406	BovineHD3000013969	AAACCATCCAAATCCAAACAGCAAGAGATATTCTGGGCATAAAATCAACACAATGAAAACTGTGGGGTAAACATTTAAAGCAAAGAGTTGGAAACAGTCTA	KB632543.1	109:1787616-1787716	KN269684.1	29:4396227-4396327		X	100.000	101	0	0	-1	0.0375
ss1440341256610	UNALM_VPA_Bovine777K_407	BovineHD3000018959	TCCTCTCTAATATCACTAAAATGCTCTTTCTCTTTAAATCTCCCTAATATAACAACTTTCTCTGAGTGGATTATTTTTTTCTTGCTGATAGTGCAGTAAAT	KB632641.1	207:394795-394895	KN267042.1	822:1291013-1291113		X	100.000	101	0	0	-1	0.0375
ss1440341256537	UNALM_VPA_Bovine777K_408	BovineHD3000022976	TACCCCCTGGGGTTTTCATAATGACCACTGATTACCACTTCTAGGACTTTAAGAAAGCTAGAATCTAGAAGGGGCCTTAACGATGCACTTGCTCAGCCATG	KB632796.1	362:614168-614268	KN269528.1	69:5418194-5418294		X	100.000	101	0	0	1	0.0375	HDAC8
ss1440341256239	UNALM_VPA_Bovine777K_409	BovineHD3000023530	ATCTAACCTGATATTAAAACATTTATATGAGTGTGTGTGGCCACATGTATAGATTTAATTTGCTAATAATTTGGAAACTTCATAATTTTTGCTCATGAGAG	KB632434.1	0:8247450-8247550	KN267102.1	387:481349-481449	5	X	100.000	101	0	0	1	0.0375	PTPN4
ss1440341256528	UNALM_VPA_Bovine777K_410	BovineHD3000024135	TGTTCATAGTTACCTTGTTCTCTGCTTTAAAAGTCCTGAGGGTTTAATAACACTTTTAAGTGGCATCTTCTGTGGGTAAGTTCCCATTGGCTATAGGCCCA	KB632643.1	209:309353-309453	KN269528.1	69:2416834-2416934		X	100.000	101	0	0	-1	0.0375
ss1440341256545	UNALM_VPA_Bovine777K_411	BovineHD3000024216	TCAAAGACGGCATCATAATACGCCCTCTTTGTACTGCCCTAAGGGCCGGATAGCTTGGGTTTTCCTTGAGCCTCAAGAGTTAGTGACAGTTCATGAACGTG	KB632609.1	175:2140028-2140128	KN270589.1	550:1001898-1001998		X	100.000	101	0	0	1	0.0375
ss1440341256595	UNALM_VPA_Bovine777K_412	BovineHD3000025408	AGGATGGACTCTTCGTCACTATACAGTGAGCTGGTCCCCTGTGCCAGCAGGTCACTGGCAGCACTGTCCATCTCGTCCAGTGTCAGGCGACATGCATCGGC	KB632607.1	173:3760061-3760161	KN268562.1	684:1772409-1772509		X	100.000	101	0	0	1	0.0375	CACNA1F
ss1440341256557	UNALM_VPA_Bovine777K_413	BovineHD3000026790	AGGAAGATAGTAAAAGTTACCATCTGGACACTCAGAACACCAGACAGGAGCAGTCAAGATCCAAATACAGAGTCTGAACAGTGTATGAACACAAGCAACAA	KB632778.1	344:567739-567839	KN268793.1	910:334063-334163		X	100.000	101	0	0	1	0.0375	PHF8
ss1440341256551	UNALM_VPA_Bovine777K_414	BovineHD3000031656	TCTAAGTGTCTGATTTCCTCATCACATATCCCACTTCTGGACATTTCACATGGACCCAGGTGGCATGTATAGCAACCTGATCTTCAGGTTTGGGTCTCAGA	KB632837.1	403:170715-170815	KN270823.1	80:570767-570867		X	100.000	101	0	0	1	0.0375
ss1440341256615	UNALM_VPA_Bovine777K_415	BovineHD3000031928	TTTAAATTAGTGTATATTAAAAGGTAGTATATCATTGATTTTGACCAAATGGGCGACATTGTCCTTACTTTTCTTAACTATTAATCTTTGCTATTTCCATC	KB632716.1	282:1080574-1080674	KN270858.1	267:5775912-5776012		X	100.000	101	0	0	1	0.0375
ss1440341256613	UNALM_VPA_Bovine777K_416	BovineHD3000032880	TCACAAAAGCCTCCATAGAAATAGACGGAGAATGAATTTCACACCAAGAATAGGAAACGAAAAGGCAGCAAAGGAAAATGTGCAGTGAACTACTCATTAAT	KB632728.1	294:205163-205263	KN270858.1	267:3422534-3422634		X	100.000	101	0	0	1	0.0375	LOC102529467
ss1440341256542	UNALM_VPA_Bovine777K_417	BovineHD3000040114	AACTTGTGGAATTTAATTTCTTTTAATGTGGAGCTATTCAAGTATTACTTTGCAGATTTTTATGGGAGAATGATATTCTGATATGACTCTTTGCCTGAGAG	KB632590.1	156:174071-174171	KN268788.1	298:2468766-2468866	X/Y	X	100.000	101	0	0	1	0.0375
ss1440341256480	UNALM_VPA_Bovine777K_418	BovineHD3000040532	TCAGGCTGGAGGCTGAGCTGTTTTTCCTGAGGCAGCGAAGTCACAGAAGGATTTTCATTTGTTGACGTGTTTATATATAGCTTCTGTCCTACTTTCTTCCG	KB632541.1	107:1221044-1221144	KN271019.1	319:203235-203335	X/Y	X	100.000	101	0	0	1	0.0375
ss1440341256227	UNALM_VPA_Bovine777K_419	BovineHD3000044766	TCAAGTAAAATGCCAGGGGACAGAAAGACAGACTTATGGTGGGAACTGAAATATATACAAATGTATGTACACAATAAACTAGTCTTGAGTCTTAAAACTTA	KB632444.1	10:5337559-5337659	KN267869.1	91:1154550-1154650	10	X	99.010	101	1	0	1	0.0375	ADCY2
ss1440341256617	UNALM_VPA_Bovine777K_420	BovineHD3000046485	CAGGTGACAGGACATCAGCACTGCCCACCAACCCCTCTAACGGGCTTTTCTGCTACTCCCTCAAATCCAGGACCCTCGGCAGTGAGCTTATTGCCAATGCG	KB632693.1	259:830174-830274	KN269750.1	862:569890-569990		X	99.010	101	1	0	-1	0.0375	IL1RAPL2
ss1440341256611	UNALM_VPA_Bovine777K_421	BovineHD4100003010	CTGATGCAGAGCTATTAACCTTGAGTGATTGCTTTTGTAAACACACTGCTTTCCACAGACAGATCAAAGGCTGTATTTTGCTCTTACAATGCCCCACAGTC	KB632630.1	196:2242775-2242875	KN269241.1	636:810711-810811		7	100.000	101	0	0	-1	0.025	TMEM108 - TMEM108 - TMEM108
ss1440341256354	UNALM_VPA_Bovine777K_422	BovineHD4100003132	GGAAAAAATGGTTGAGTGTGGGCCAAAAGCTCCCAGAACCAGCAGAGGCTATTCAGGGCCCTGGCTTTCTGTGTGACTCTGGCAAGTGTCTTTTCCTCTTT	KB632464.1	30:6588013-6588113	KN270571.1	72:5078123-5078223		7	100.000	101	0	0	1	0.0375	CRHR2
ss1440341256621	UNALM_VPA_Bovine777K_423	BovineHD4100003171	ACTTATACCTCATGACTTAACCAAAATTGTCTTAGTCTCAGTTCCTACCATAATGAGGGAGCCTCCCAAATGACTCTTTTCTAATCTACAGCATCGCCCTG	KB632702.1	268:1775060-1775160	KN267161.1	535:2066164-2066264		7	100.000	101	0	0	1	0.0375	CALD1
ss1440341256548	UNALM_VPA_Bovine777K_424	BovineHD4100004289	GTTCCTAAATGCCTTGGCTCCTGATCAACAAAAGCCATTGAAAGGCTTAATCCTCTAAGCTTGGCACCACATCAGTCTGGAAGTAGTTTACATGCAGAGTC	KB632808.1	374:269041-269141	KN268387.1	1:7916082-7916182		2	100.000	101	0	0	-1	0.0375	DKK2
ss1440341256389	UNALM_VPA_Bovine777K_425	BovineHD4100009180	GCTCAGTCATGCTTATGAACACAGAGAAAGGACACAGCACTTTACTAAAACAAACAGTCTTCCAGTGTTTAAGTGCTATATGGATTGCAACAAACCATATT	KB632486.1	52:4013328-4013428	KN268836.1	12:10603245-10603345	4		100.000	101	0	0	-1	0.0375	MVB12B
ss1440341256310	UNALM_VPA_Bovine777K_426	BovineHD4100018004	AAGAGAACCCCGCTTGCTGTGGAGAACTCTTGTCTGGAGCAACCTGGAGATATTTTCAGCTACGTGGACAAAGACTTCCGGTCCCTGCTGCCTTTTCCACC	KB632448.1	14:9017658-9017758	KN269929.1	22:5086141-5086241	22	11	100.000	101	0	0	-1	0.0375	TENM2 - TENM2 - TENM2
ss1440341256291	UNALM_VPA_Bovine777K_427	BovineHD4100018705	TGTCATCTGTATCACTCATGCCGTTCCCCCCATCCCCTGTCATCTATTTCATTTCTCTTTTCTTCTTCCTGTTTTTCCTAATATGCCCATCCCCACTCCCC	KB632439.1	5:4568264-4568364	KN270144.1	109:20157998-20158098		11	100.000	101	0	0	1	0.0375	MAP1B - MAP1B - MAP1B
ss1440341256616	UNALM_VPA_Bovine777K_428	BTA-42224-no-rs	CAAGGGATGCTTTAGGCTGTGATCAATTGCTTGGCAGGTGAATTCTTTACCAACCTCTTTTAAATATCAGAGGTGCCAAGTGCTTTAAATCAACATTTATA	KB632730.1	296:99742-99842	KN270590.1	1558:350154-350254			100.000	101	0	0	-1	0.025	ETV4
ss1440341256256	UNALM_VPA_Bovine777K_429	BTA-76627-no-rs	CAATAGTGGTAGGACATATGCTTATAATTTTAGGAATGGAGGCACTTTAGATAAGGTGGAACTTGTCACTGGAAAATGAGCTCCAGTGAAGTTGTTTCCTG	KB632443.1	9:5148371-5148471	KN270052.1	1160:234730-234830	2	2	100.000	101	0	0	-1	0.0375
ss1440341256404	UNALM_VPA_Bovine777K_430	BTA-85374-no-rs	TGCTTTTCTGGCTCTGGATCGTGCGCTCAGTTTCAACAGCCCTTGTGCTTATCTCTAGGACTGGAATGTGTCTGCTATTTATAGTATGAAGAGTTAAATCT	KB632474.1	40:8501016-8501116	KN270032.1	525:1291006-1291106	28	7	93.069	101	0	1	-1	0.0375	NPHP1
ss1440341256358	UNALM_VPA_Bovine777K_431	BTB-00220345	GAGTGATCTAGTTCCCTATAGACATGTCTGTCACTCCCCTCCACCAACCCCAGCTTTGATCTGCATTCCTGGAATCTGGCATTTATCCCAGTTTCCTCTCC	KB632495.1	61:8915327-8915427	KN270787.1	469:3018448-3018548	11	17	99.010	101	1	0	1	0.0375
ss1440341256405	UNALM_VPA_Bovine777K_432	BTB-00466621	CATTCCTCAGATTTATTCTATCACTTTTTCTAAATGAATGAATAAATAAATCACAAAACTGAGAGCCTTTCTTTTACCCGGTAGACTCGTCCAATCTAGAA	KB632492.1	58:5394495-5394595	KN268954.1	307:1955198-1955298	X/Y		100.000	101	0	0	-1	0.0375	LOC107033690
ss1440341256563	UNALM_VPA_Bovine777K_433	BTB-00886719	AATAAAATGTAAGTATTAATGTTCCTAAGTCAAAGGGGAAAAAACCCACAATCTTCCATTAAGTAGGATTTACAGTAATTACTGAAGATGATGCCAGGTGG	KB632670.1	236:1378646-1378746	KN269151.1	450:1355775-1355875			100.000	101	0	0	1	0.0375	WDFY4
ss1440341256380	UNALM_VPA_Bovine777K_434	BTB-01219206	TGCTCTGGACAGACAGCGTGGCTAGATTTTTCCATGTCCTTATGCAGAAACTATGGGTTGTTGGAATTCAGTAAAATGAACTCAAAAAACCTGATTTTAAA	KB632463.1	29:9563578-9563678	KN270091.1	283:4921429-4921529			100.000	101	0	0	-1	0.025
ss1440341256246	UNALM_VPA_Bovine777K_435	BTB-01255458	TGAAGTTTGGAACTTTGTCCATCAGTGATAGTTTAACCTGTGATCATACAATATACAATTACAATATGCAATTTTTTTACCCTCACTAGCAATTGCAAAGT	KB632444.1	10:8689604-8689704	KN268482.1	43:12618615-12618715	10		100.000	101	0	0	-1	0.0375	LOC107034967
ss1440341256335	UNALM_VPA_Bovine777K_436	BTB-01404845	GCCTAAGCCTAGTTAATATATTTTGCTGAACTTTGGAAATGAATGTCATAGCTGTTCAGATTTGTGACATATTAAAGATGACTATTACTCTGGATAATGAA	KB632469.1	35:3293471-3293571	KN271044.1	193:7069267-7069367		1	100.000	101	0	0	1	0.0375
ss1440341256397	UNALM_VPA_Bovine777K_437	Hapmap23460-BTA-133938	AAAGTGAATTTGAGATGAAACGTAAAGCATATTTTCTAAGCAACAAAGATAATTTCTTAATTTGAAAATTTCTTATTTTTTATCTTACGAGTTGGAATAGT	KB632471.1	37:11010111-11010211	KN270976.1	377:913741-913841	31		99.010	101	1	0	-1	0.0375
ss1440341256272	UNALM_VPA_Bovine777K_438	Hapmap33585-BTA-141411	TACATTTTTTCTGAGAATGGTTATACCAAAATAAAAATAATTTCTGAATTATCAAGTGAAGCAGTAGTAAAACACATTAAAAATTCCTTTACAGACTTGAT	KB632438.1	4:3655941-3656041	KN269500.1	324:13549812-13549912			100.000	101	0	0	-1	0.0375
ss1440341256260	UNALM_VPA_Bovine777K_439	Hapmap33789-BTA-158745	CATTTCCTATGTTTAAATAAAGAGATGAAGAAAACGGAATGGGATTTAGTGTTTTATTTGATATATATATATATATTAGAATTTAGAAAAGTTTTCCTACA	KB632443.1	9:13958231-13958331	KN267643.1	305:1689073-1689173	2		100.000	101	0	0	1	0.0375
ss1440341256240	UNALM_VPA_Bovine777K_440	Hapmap34029-BES2_Contig454_1301	CTGGGATGTAAAGCTGAAGAGATGCCTTGGTGATATATTGTAGGGTGTCTTGAAGACCAGACTGAAAAACACGGGACTTTATCTATTAGAAAGTTCATTTC	KB632454.1	20:12517064-12517164	KN268757.1	809:1151381-1151481	11		100.000	101	0	0	1	0.0375
ss1440341256235	UNALM_VPA_Bovine777K_441	Hapmap35197-BES11_Contig441_882	AAATGTAAATTCCTTTTCCACAAAAGAAATATACATCTCATGTTTTTGTTTGTTTGTTTTCAACTAATTATTACTACTTCGGAATTGCTGTATGAGTTAAA	KB632442.1	8:11968624-11968724	KN270157.1	233:891858-891958			100.000	101	0	0	-1	0.0375
ss1440341256558	UNALM_VPA_Bovine777K_442	Hapmap38347-BTA-74361	CCAAGTAGCGGTAGTAGGACCTGCCCCTCGGCGGGGGTGCGGATTGCTCCTGGAAATGCTAGCACTGCTGTTATTATTTAGCATGTATTAAGCGCCCCCAG	KB632640.1	206:1575565-1575665	KN270645.1	184:7276350-7276450			100.000	101	0	0	-1	0.0375	SLC20A2
ss1440341256350	UNALM_VPA_Bovine777K_443	Hapmap40185-BTA-68018	ATCCAAGGGCCAGGCTGTTCAACCTGAAAATGATTATTTTCTTTCTTTTCCATAATGTATCGGAAGTGGATCTCAAAGAACCTCCAGGATGCAGAGGGGGT	KB632490.1	56:7664637-7664737	KN269662.1	341:5826521-5826621			100.000	101	0	0	-1	0.0375
ss1440341256284	UNALM_VPA_Bovine777K_444	Hapmap43934-BTA-76802	TTGGTTGTAGCTCTCTGCCAGAATTTTAACTGAAGAAGGTAATGCTTCTATTGTGTGCTTACAGATGTGATGAATACAAGAAAGTGAGAGTTTAAGTTGTC	KB632443.1	9:6654485-6654585	KN267800.1	245:2152083-2152183	2	2	100.000	101	0	0	-1	0.05
ss1440341256453	UNALM_VPA_Bovine777K_445	Hapmap49850-BTA-107112	CTGTACACCACTCACATTGTAACTTCCCAACTGCCACAACACTGAGACTTTGAGAGCAGAAACCACATCTTGCCTTGTGCTCAGCACAGCACCAAGCGTGC	KB632551.1	117:1535054-1535154	KN266850.1	17:1523534-1523634			100.000	101	0	0	1	0.0375	ERC1
ss1440341256353	UNALM_VPA_Bovine777K_446	Hapmap50685-BTA-41728	AAAAACTGATTATTGGTCGCTGCTCTATGTCCGACACTGTGCAGACTTGTGTCATTAATTAATTAATAATTACAAAGCCTGCTAAATCAATGTCATATCTT	KB632502.1	68:1197476-1197576	KN269608.1	6:4210993-4211093			100.000	101	0	0	-1	0.0375
ss1440341256419	UNALM_VPA_Bovine777K_447	Hapmap51663-BTA-94927	TTATGTAAATGGAAAATCTATTGTCTTATTAACTATGACCTCGGGTAAGTCATTTGAATGATTACTACTTTACAACTCTTATTGTGTGGAAGCTCTGTGAA	KB632469.1	35:10487224-10487324	KN269370.1	116:15174069-15174169		1	100.000	101	0	0	-1	0.0375
ss1440341256604	UNALM_VPA_Bovine777K_448	Hapmap52259-rs29019756	GACTGGAAACATTCTGCAGCTGACACACAGACTCTGAAGAAGGAAGAAAGGAAAACAGAGGCACATGGGCTACTGATGTGTGTCCACTCTGAGGAAAGAAA	KB632705.1	271:1398446-1398546	KN270339.1	872:781714-781814	10		100.000	101	0	0	-1	0.0375
							Legend for Gene ontology
							Gene acronyms in red are involved in Positive regulation of synaptic transmission
							Gene acronyms in green are involved in Cell morphogenesis
							Gene acronyms in blue are involved in Cell adhesion
							Gene acronyms in brown are involved in Generation of neurons
							Gene acronyms in purple are involved in Regulation of multicellular organismal process
							Gene acronyms in black were not identified to belong to any of the five major ontology groups above.
